# Supplementary material for: Novel Selective and Low-Toxic Inhibitor of LmCPB2.8ΔCTE (CPB) One Important Cysteine Protease for Leishmania Virulence
Source: MDPI journal article supplement (doi:10.3390/biom12121903), 2022-12-19
Supplement: s1 [file s1]

## Novel Selective and Low-Toxic Inhibitor of *Lm*CPB2.8 $\Delta$ CTE (CPB) One Important Cysteine Protease for *Leishmania* Virulence

Vitor Partite Moreira <sup>1</sup>, Michele Ferreira da Silva Mela <sup>2</sup>, Luana Ribeiro dos Anjos <sup>1</sup>, Leonardo Figueiredo Saraiva <sup>3</sup>, Angela M. Arenas Velásquez <sup>2</sup>, Predrag Kalaba <sup>4</sup>, Anna Fabisiková<sup>5</sup>, Leandro da Costa Clementino <sup>2</sup>, Mohammed Aufy <sup>6</sup>, Christian Studenik <sup>6</sup>, Natalie Gajic <sup>7</sup>, Alexander Prado-Roller <sup>7</sup>, Alvicler Magalhães <sup>8</sup>, Martin Zehl <sup>5,9</sup>, Ingrid Delbone Figueiredo <sup>2</sup>, Amanda Martins Baviera <sup>2</sup>, Eduardo Maffud Cilli <sup>10</sup>, Marcia A. S. Graminha <sup>2,\*</sup>, Gert Lubec <sup>11,\*</sup> and Eduardo R. Perez Gonzalez <sup>1,\*</sup>

<sup>1</sup> Fine Organic Chemistry Lab, School of Sciences and Technology, São Paulo State University (UNESP), Presidente Prudente 19060-080, Brazil

<sup>2</sup> School of Pharmaceutical Sciences, São Paulo State University (UNESP), Araraquara 14800-903, Brazil

<sup>3</sup> Laboratory of Luminescence in Materials and Sensors, School of Sciences and Technology, São Paulo State University (UNESP), Presidente Prudente 19060-560, Brazil

<sup>4</sup> Department of Pharmaceutical Sciences, Division of Pharmaceutical Chemistry, Faculty of Life Sciences, University of Vienna, Josef Hlaubek Platz 2, UZAIL, 1090 Vienna, Austria

<sup>5</sup> Mass Spectrometry Centre, Faculty of Chemistry, University of Vienna, Währinger Straße 38, 1090 Vienna, Austria

<sup>6</sup> Department of Pharmaceutical Sciences, Division of Pharmacology and Toxicology, University of Vienna, Josef Hlaubek Platz 2, UZAIL (2D 259), 1090 Vienna, Austria

<sup>7</sup> Centre for X-ray Structure Analysis, Faculty of Chemistry, University of Vienna, Währinger Straße 40-42, 1090 Vienna, Austria

<sup>8</sup> Department of Organic Chemistry, Chemistry School, Federal University of Rio de Janeiro, Rio de Janeiro 21941-598, Brazil

<sup>9</sup> Department of Analytical Chemistry, Faculty of Chemistry, University of Vienna, Währinger Straße 38, 1090 Vienna, Austria

<sup>10</sup> Department of Biochemistry and Organic Chemistry, Institute of Chemistry, São Paulo State University (UNESP), Araraquara 14800-060, Brazil

<sup>11</sup> Department of Neuroproteomics, Paracelsus Medical University, 5020 Salzburg, Austria

\* Correspondence: marcia.graminha@unesp.br (M.A.S.G.); gert.lubec@lubecclab.com (G.L.); eduardo.gonzalez@unesp.br (E.R.P.G.)

## Table of Contents

|                                                                       |              |
|-----------------------------------------------------------------------|--------------|
| HRESIMS spectra of LQOF-G6                                            | Page S3-S4   |
| HPLC analysis report LQOF-G6                                          | Page S5      |
| NMR spectra and NMR study of LQOF-G6                                  | Page S6-S15  |
| Characterization data of the new lot of LQOF-G6                       | Page S15     |
| LC-HPLC analysis report of LQOF-G32                                   | Page S16     |
| ESI-(+)MS and ESI-(+) MS/MS analysis report of LQOF-G32               | Page S17     |
| EI-MS analysis report of LQOF-G32.                                    | Page S18     |
| NMR spectra and NMR study of LQOF-G32                                 | Page S18-S20 |
| Characterization data of the new lot of LQOF-G32                      | Page S20     |
| G6 Crystal data, data collection parameters, and structure refinement | Page S21     |
| Datablock: lqof_g6_pca21.                                             | Page S22-S23 |
| G1 Sample, crystal data and data collection and structure refinement. | Page S24     |
| Datablock: prka_lqof_g1_It_p212121.                                   | Page S25-S26 |
| Cell and organ toxicity data                                          | Page S26-S28 |
| Docking Investigation                                                 | Page S28-S37 |
| In Vitro Pharmacology: Proteases Assays Report                        | Page S38-S42 |

## LQOF-G6 Characterization

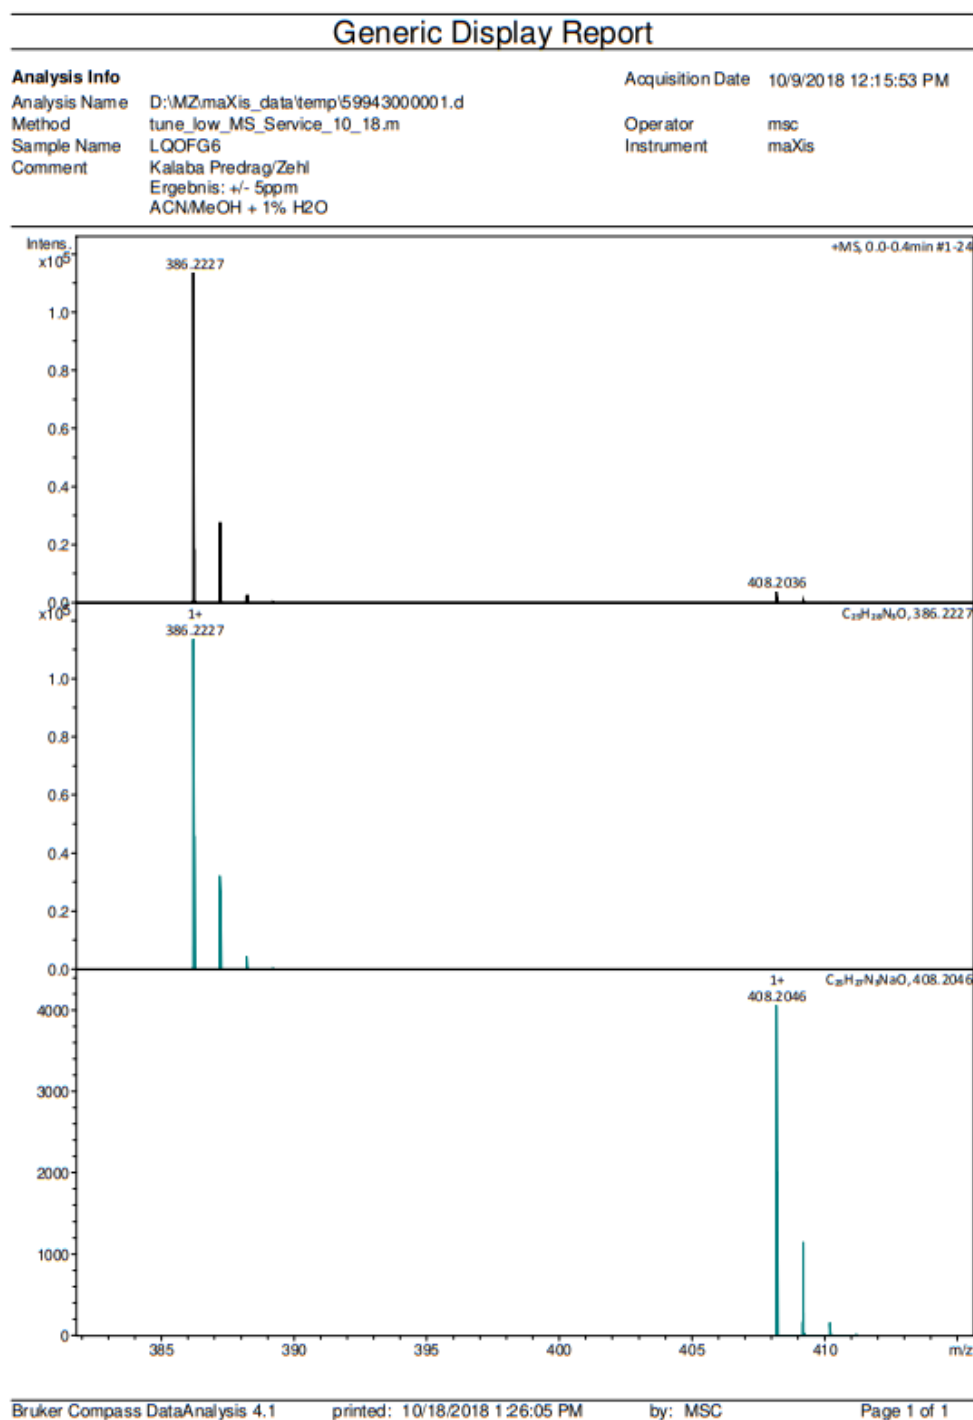

**Figure S1.** HRESIMS Spectrum of – LQOF-G6

## Mass Spectrum SmartFormula Report

### Analysis Info

Analysis Name D:\MZ\maXis\_data\temp\59943000001.d  
 Method tune\_low\_MS\_Service\_10\_18.m  
 Sample Name LQOFG6  
 Comment Kalaba Predrag/Zehl  
 Ergebnis: +/- 5ppm  
 ACN/MeOH + 1% H2O

Acquisition Date 10/9/2018 12:15:53 PM

Operator msc  
 Instrument maXis 255552.00016

### Acquisition Parameter

|             |            |                      |          |                  |           |
|-------------|------------|----------------------|----------|------------------|-----------|
| Source Type | ESI        | Ion Polarity         | Positive | Set Nebulizer    | 0.4 Bar   |
| Focus       | Not active | Set Capillary        | 4500 V   | Set Dry Heater   | 180 °C    |
| Scan Begin  | 50 m/z     | Set End Plate Offset | -500 V   | Set Dry Gas      | 4.0 l/min |
| Scan End    | 1900 m/z   | Set Charging Voltage | 0 V      | Set Divert Valve | Source    |
|             |            | Set Corona           | 0 nA     | Set APCI Heater  | 0 °C      |

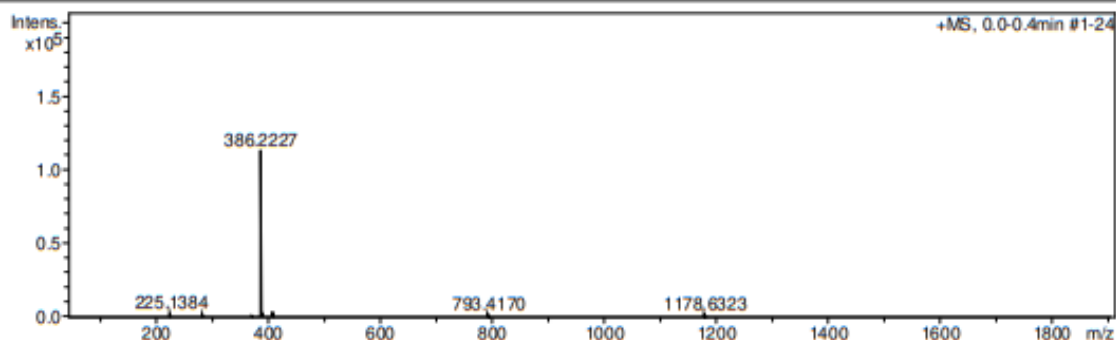

| Meas. m/z | # | Ion Formula                                        | Score  | m/z      | err [mDa] | err [ppm] | mSigma | rdb  | e <sup>-</sup> Conf | N-Rule |
|-----------|---|----------------------------------------------------|--------|----------|-----------|-----------|--------|------|---------------------|--------|
| 386.2227  | 1 | C <sub>25</sub> H <sub>28</sub> N <sub>3</sub> O   | 100.00 | 386.2227 | -0.0      | -0.0      | 21.7   | 13.5 | even                | ok     |
| 408.2036  | 1 | C <sub>25</sub> H <sub>27</sub> N <sub>3</sub> NaO | 100.00 | 408.2046 | 1.1       | 2.6       | 25.2   | 13.5 | even                | ok     |

59943000001.d

Bruker Compass DataAnalysis 4.1

printed: 10/18/2018 1:26:10 PM

by: MSC

Page 1 of 1

**Figure S2.** HRESIMS Spectrum Smart Formula Report of – LQOF-G6

## <Sample Information>

Sample Name : LQOF-G6  
Sample ID : LQOF-G6  
Data Filename : LQOF-G6\_purity01.lcd  
Method Filename : 10-90%\_gradient\_purity.lcm  
Batch Filename :  
Vial # : 1-7  
Injection Volume : 20 µL  
Date Acquired : 14.12.2018 13:24:54  
Date Processed : 14.12.2018 14:24:56

Sample Type : Unknown  
Acquired by : System Administrator  
Processed by : System Administrator

## <Chromatogram>

mAU

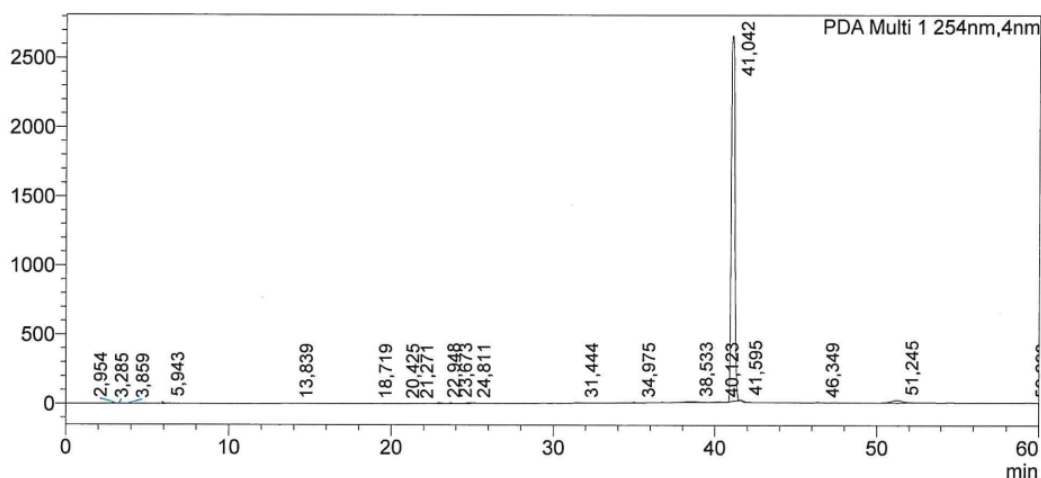

## <Peak Table>

PDA Ch1 254nm

| Peak# | Ret. Time | Area     | Height  | Area%   |
|-------|-----------|----------|---------|---------|
| 1     | 2,954     | 67151    | 8837    | 0,158   |
| 2     | 3,285     | 13046    | 2712    | 0,031   |
| 3     | 3,859     | 1035     | 311     | 0,002   |
| 4     | 5,943     | 23789    | 12714   | 0,056   |
| 5     | 13,839    | 3067     | 309     | 0,007   |
| 6     | 18,719    | 699      | 189     | 0,002   |
| 7     | 20,425    | 2254     | 551     | 0,005   |
| 8     | 21,271    | 3696     | 687     | 0,009   |
| 9     | 22,948    | 54625    | 4837    | 0,129   |
| 10    | 23,673    | 44723    | 6645    | 0,105   |
| 11    | 24,811    | 130190   | 5109    | 0,307   |
| 12    | 31,444    | 80748    | 3602    | 0,190   |
| 13    | 34,975    | 31277    | 4304    | 0,074   |
| 14    | 38,533    | 362108   | 6594    | 0,853   |
| 15    | 40,123    | 73188    | 2226    | 0,172   |
| 16    | 41,042    | 40701752 | 2642407 | 95,842  |
| 17    | 41,595    | -54767   | 249     | -0,129  |
| 18    | 46,349    | 32898    | 2275    | 0,077   |
| 19    | 51,245    | 884646   | 17695   | 2,083   |
| 20    | 59,293    | 11432    | 689     | 0,027   |
| Total |           | 42467558 | 2722942 | 100,000 |

**Figure S3.** RP-HPLC analysis report – LQOF-G6

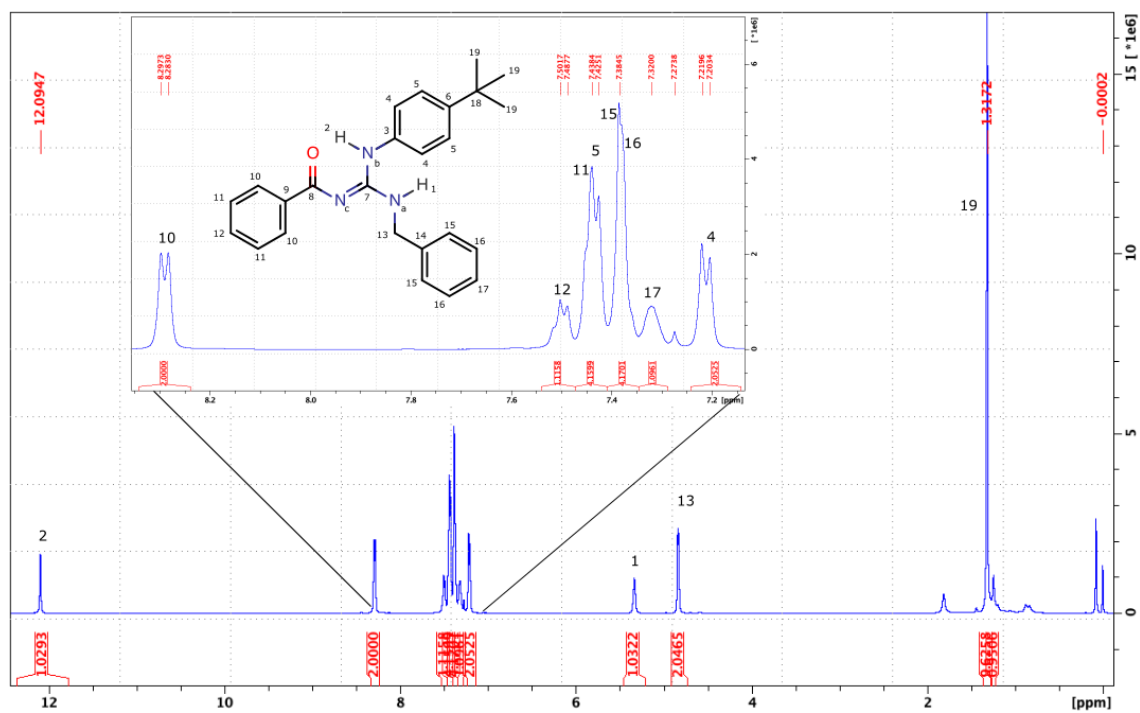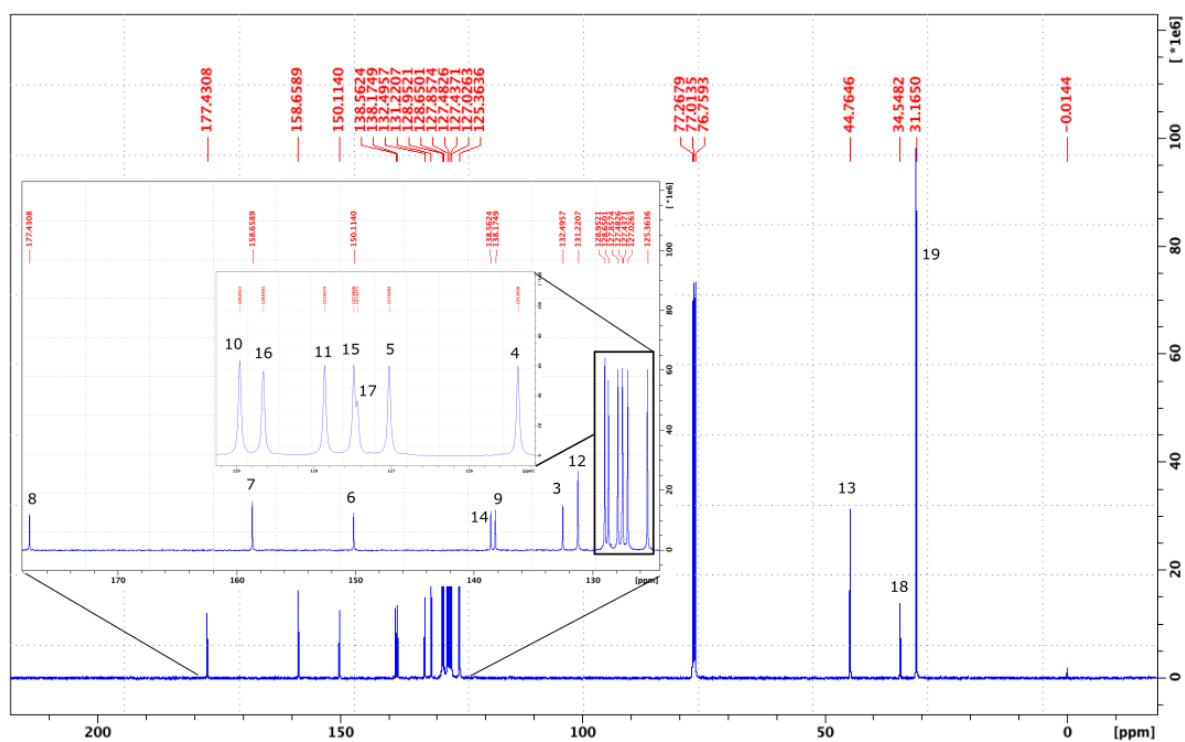

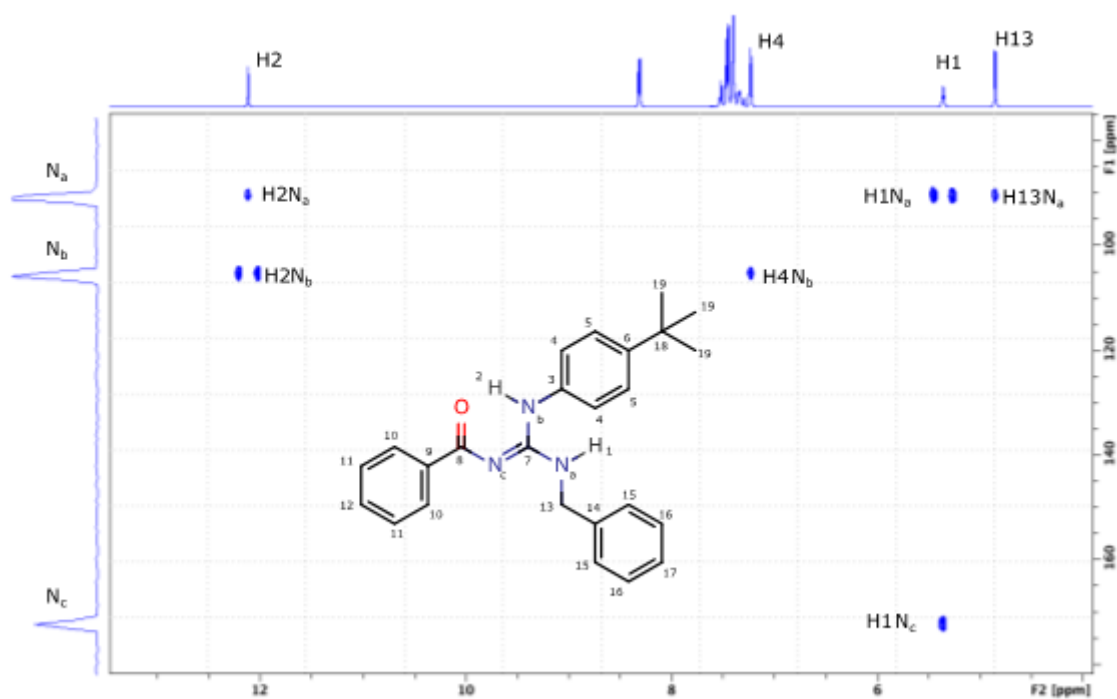

**Figure S6.**  $^1\text{H} - ^{15}\text{N}$  HMBC spectrum of **LQOF-G6** at 253K.

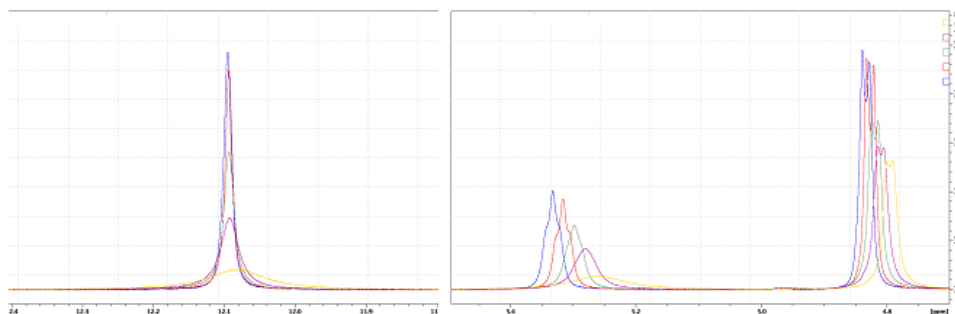

**Figure S7.**  $^1\text{H}$  spectrum of **LQOF-G6** in  $\text{CDCl}_3$  (10 mg/mL) at different temperature values ( $T(\text{K}) = 298$  (yellow), 283 (purple), 273 (green), 263 (red) and 253 (blue)). (left) Hydrogen H2. (right) Hydrogens H1 and H13.

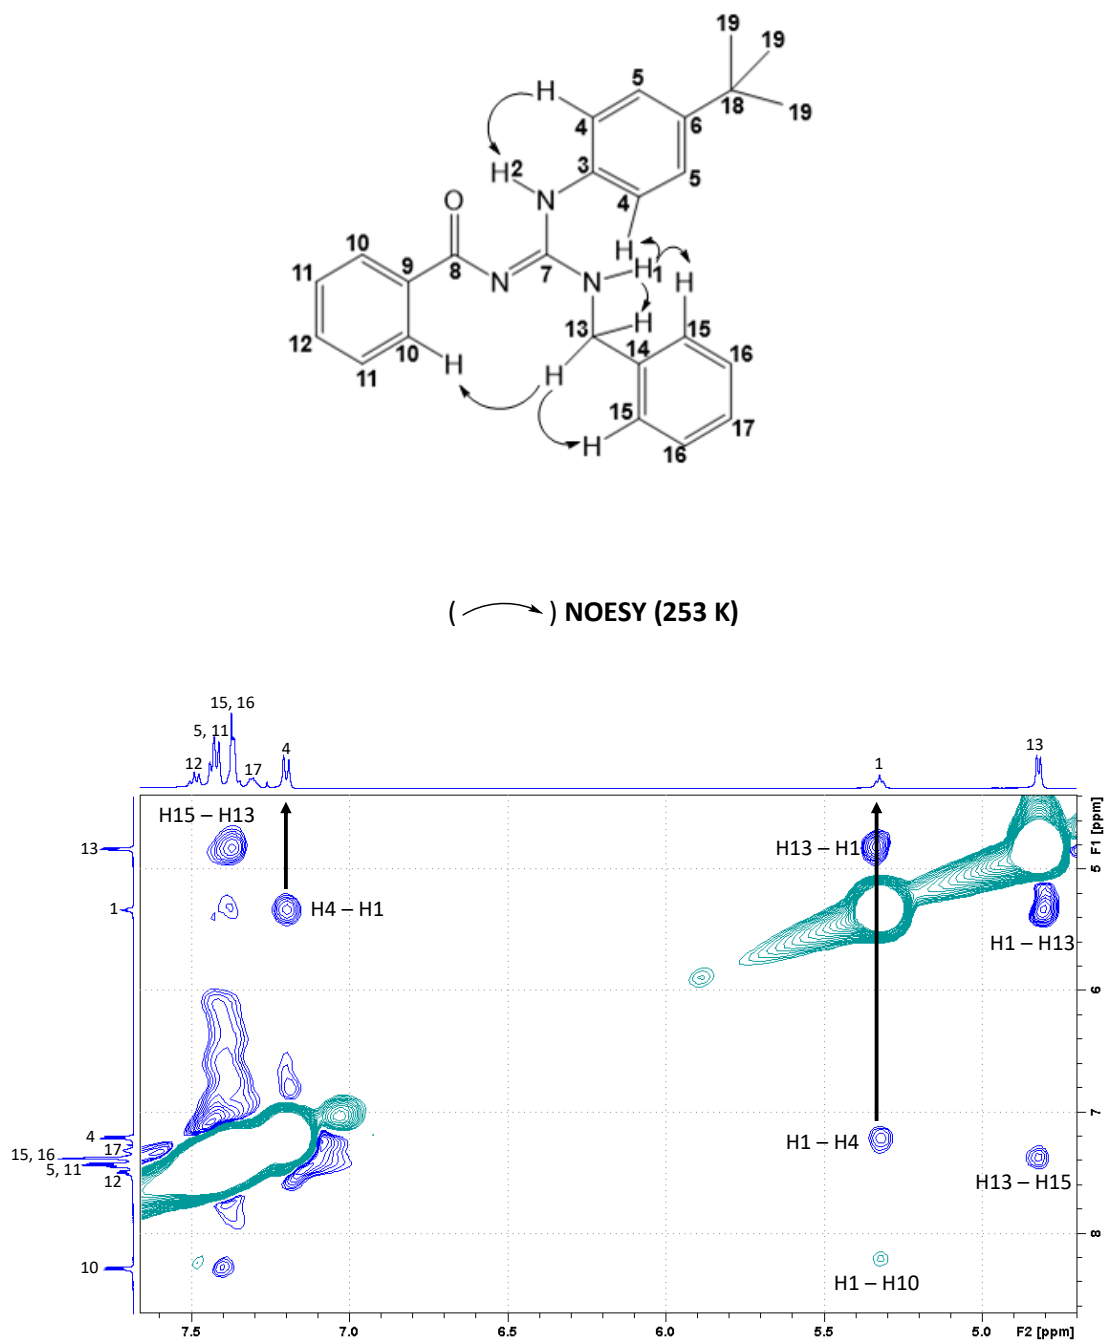

**Figure S8.** NOESY spectrum in the region of 4.7 to 7.7 ppm, where can be observed the correlation H1-H4 at 253K. The hydrogens shown in the NOESY spectrum correspond to the X-ray output attribution as follows H2(N1A) and H4(C7A).



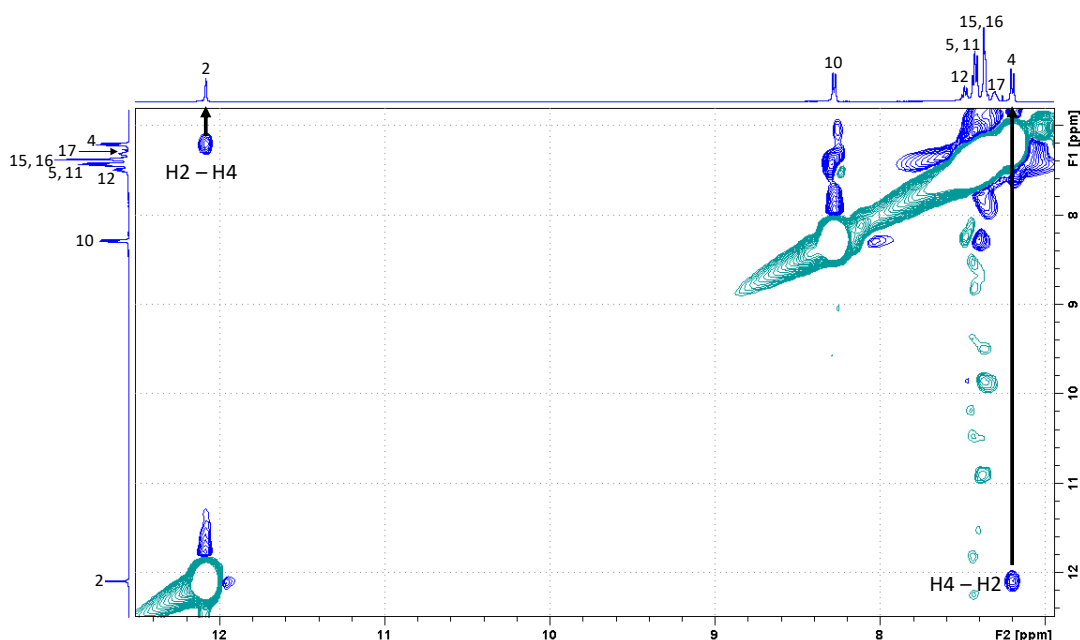

**Figure S9.** NOESY spectrum in the region of 7.6 to 12.5 ppm, where can be observed the correlation H2-H4 at 253K. The hydrogens shown in the NOESY spectrum correspond to the X-ray output attribution as follows H2(N2A) and H4(C7A).

### NMR study

The **LQOF-G6** molecule was characterized in detail by 1D- and 2D-NMR analyses. **Tables S1** and **S2** summarize the values of the chemical shift of the  $^1\text{H}$  and  $^{13}\text{C}$  nuclei of **LQOF-G6** in  $\text{CDCl}_3$  at 253K. The  $^1\text{H}$  NMR spectrum (**Figure S3**) shows the signals of the nine equivalent H of the *tert*-butyl group (H19), two methylene (H13), two equivalent aromatic (H10), and two exchangeable *N*-bound hydrogens (H1 and H2). The seven signals of the remaining 12 aromatic hydrogens were clustered in the region 7.20-7.55 ppm with some of them overlapping. The signal at 177.431 ppm in the  $^{13}\text{C}$  spectrum at 253K (**Figure S4**) is characteristic for a carbonyl and thus assigned to C8. The signals in the aliphatic region at 44.765, 34.548, and 31.165 ppm were attributed to the benzylic C13, the quaternary C18 and the three equivalent methyl carbons of the *tert*-butyl group C19, respectively.

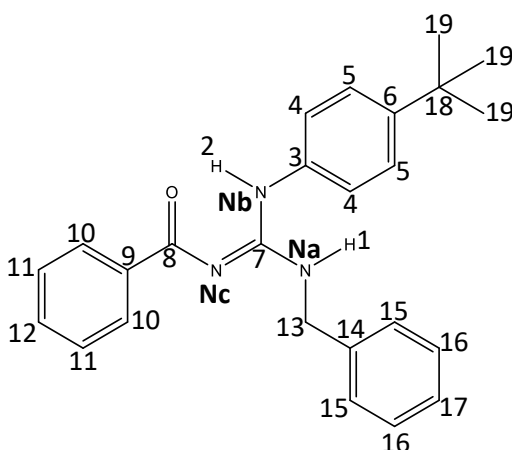

The **LQOF-G6** molecule was characterized in detail by 1D- and 2D-NMR analyses. **Tables S1** and **S2** summarize the values of the chemical shift of the  $^1\text{H}$  and  $^{13}\text{C}$  nuclei of **LQOF-G6** in  $\text{CDCl}_3$  at 253K. The  $^1\text{H}$  NMR spectrum (**Figure S4**) shows the signals of the nine equivalent H of the *tert*-butyl group (H19), two methylene (H13), two equivalent aromatic (H10), and two exchangeable *N*-bound hydrogens (H1 and H2). The seven signals of the remaining 12 aromatic hydrogens were clustered in the region 7.20-7.55 ppm with some of them overlapping. The signal at 177.431 ppm in the  $^{13}\text{C}$  spectrum at 253K (**Figure S5**) is characteristic for a carbonyl and thus assigned to C8. The signals in the aliphatic region at 44.765, 34.548, and 31.165 ppm were attributed to the benzylic C13, the quaternary C18 and the three equivalent methyl carbons of the *tert*-butyl group C19, respectively.

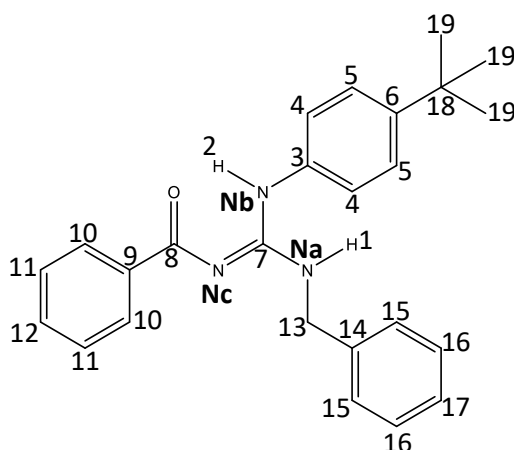

**Table S1.**  $^1\text{H}$  chemical shift values ( $\delta$  ppm) of the compound **LQOFG-6** in  $\text{CDCl}_3$  at 253 K.

| Atom           | H1        | H2    | H4   | H5   | H10       | H11       |
|----------------|-----------|-------|------|------|-----------|-----------|
| $\delta$ (ppm) | 5.33      | 12.09 | 7.21 | 7.42 | 8.29      | 7.43      |
| Multiplicity   | T         | s     | d    | d    | dd        | dt        |
| J (Hz)         | 5.89      |       | 8.26 | 8.26 | 7.26/1.11 | 7.26/7.32 |
|                |           |       |      |      |           |           |
| Atom           | H12       | H13   | H15  | H16  | H17       | H19       |
| $\delta$ (ppm) | 7.50      | 4.83  | 7.38 | 7.37 | 7.31      | 1.32      |
| Multiplicity   | Tt        | d     | -    | -    | -         | -         |
| J (Hz)         | 7.32/1.11 | 5.89  | -    | -    | -         | -         |

**Table S2.**  $^{13}\text{C}$  chemical shift values ( $\delta$  ppm) of the compound **LQOF-G6** in  $\text{CDCl}_3$  at 253 K.

| C3      | C4      | C5      | C6      | C7      | C8      | C9      | C10     | C11     |
|---------|---------|---------|---------|---------|---------|---------|---------|---------|
| 132.495 | 125.363 | 127.026 | 150.114 | 158.658 | 177.430 | 138.174 | 128.952 | 127.857 |
| C12     | C13     | C14     | C15     | C16     | C17     | C18     | C19     |         |
| 131.220 | 44.764  | 138.562 | 127.482 | 128.650 | 127.437 | 34.548  | 31.165  |         |

As suggest by the chemical shift of 12.09 ppm, H2 is involved in formation of an intramolecular hydrogen bond with the carbonyl group as is the case in the crystal structure. The  $^{13}\text{C}$  signal corresponding to C7 appeared at 158.659 ppm, characteristic of a guanidinic nucleus central carbon atom.

For a more complete characterization of **LQOF-G6**, 2D analysis of heteronuclear couplings were performed. Therefore, the assignment of the  $^1\text{H}$  and  $^{13}\text{C}$  signals (**Figures S3 and S4**) was also confirmed by the corresponding correlations in the  $^1\text{H}$ - $^{13}\text{C}$  HSQC spectrum. The aliphatic region (**Figure S7**) showed signals corresponding to correlations between carbon atoms C19 (31.165 ppm) and C13 (44.765 ppm) with hydrogens H19 (1.32 ppm) and H13 (4.83 ppm), respectively. The aromatic region of the HSQC spectrum (**Figure S8**) shows the following linking of the carbons to their directly bound hydrogens: C4/H4 (125.364/7.21 ppm), C5/H5 (127.026/7.42 ppm), C10/H10 (128.952/8.29 ppm), C12/H12 (131.221/7.50 ppm) and C15/H15 (127.483/7.38 ppm).

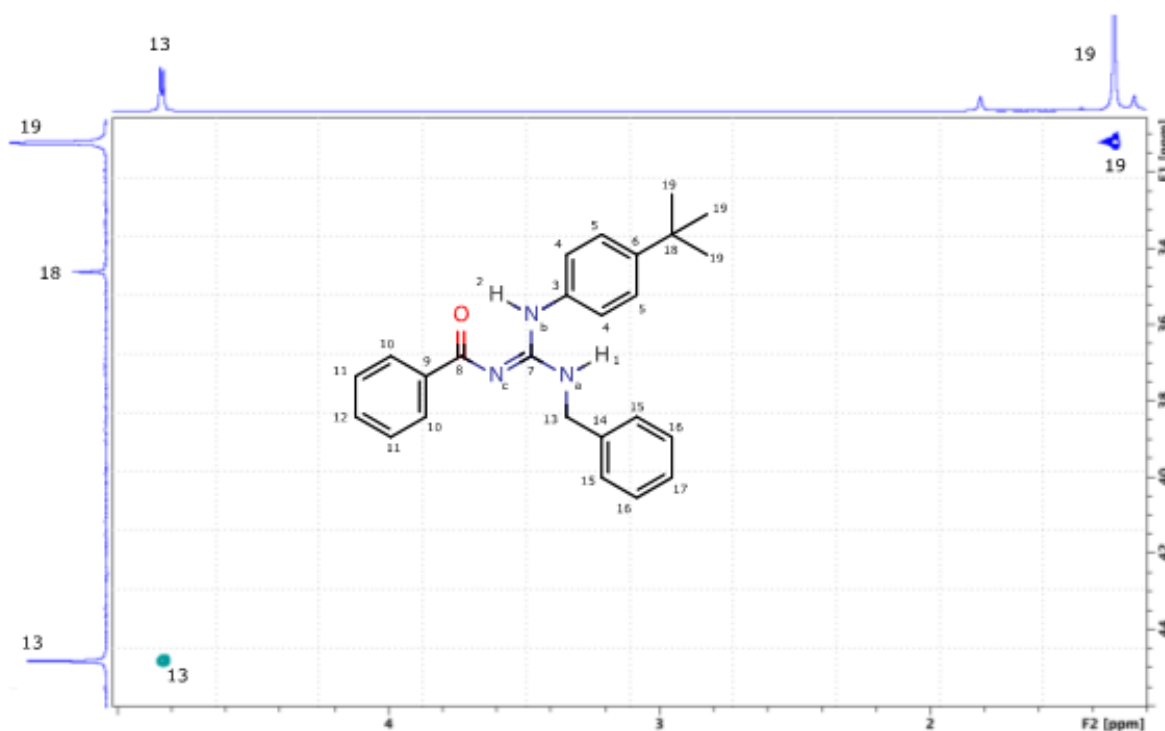

**Figure S10.** Aliphatic region of the  $^1\text{H}$ - $^{13}\text{C}$  HSQC spectrum of **LQOF-G6** at 253K in  $\text{CDCl}_3$ .

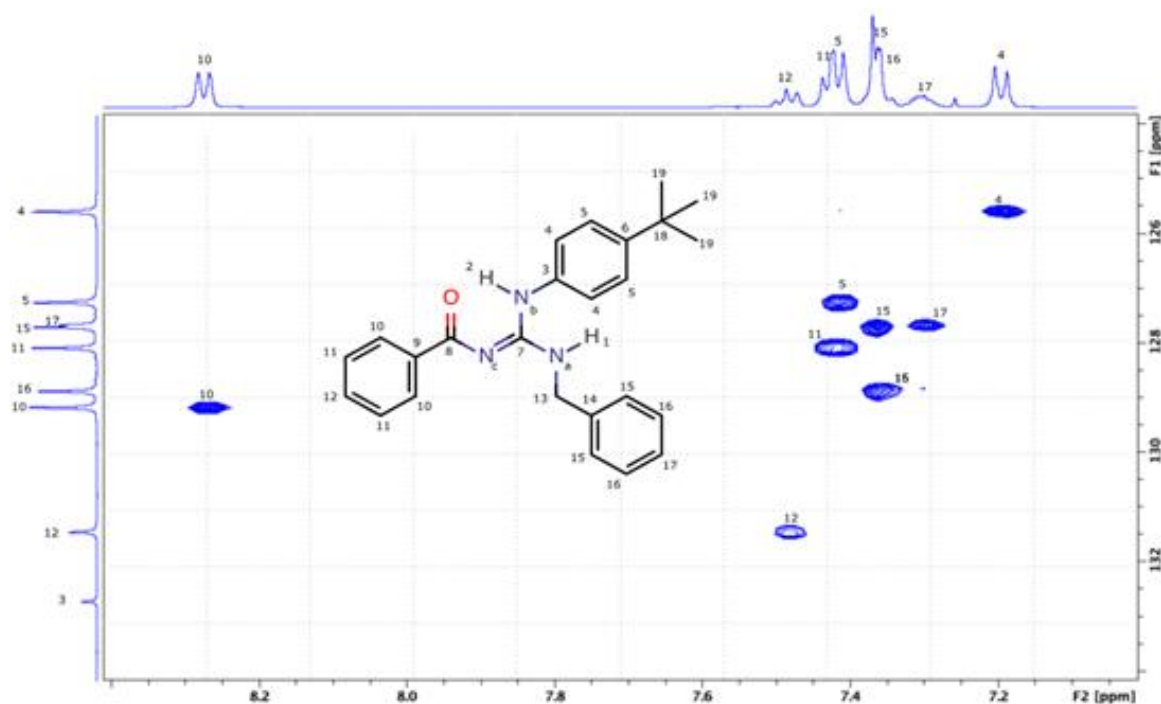

**Figure S11.** Aromatic region of the  $^1\text{H}$ - $^{13}\text{C}$  HSQC spectrum of **LQOF-G6** at 253K in  $\text{CDCl}_3$ .

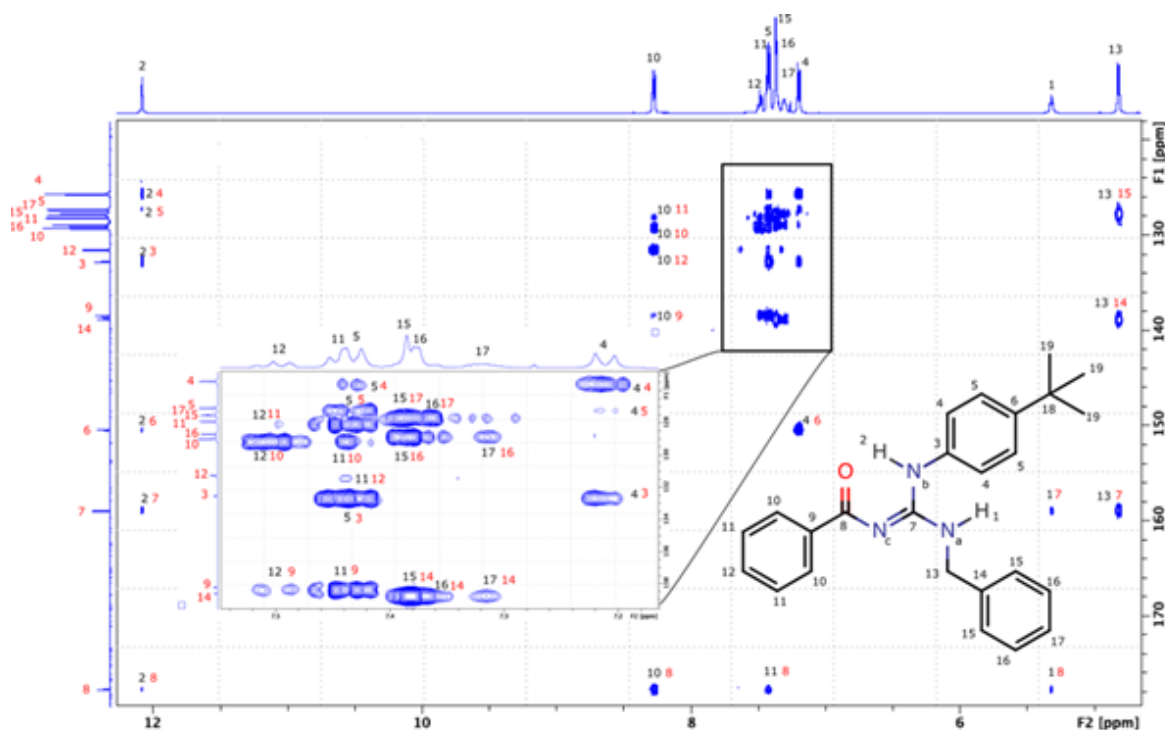

**Figure S12.** Aromatic region of the  $^1\text{H}$ - $^{13}\text{C}$  HMBC spectrum of **LQOF-G6** at 253K in  $\text{CDCl}_3$  (black numbers indicate  $^1\text{H}$  and red numbers indicate  $^{13}\text{C}$ ).



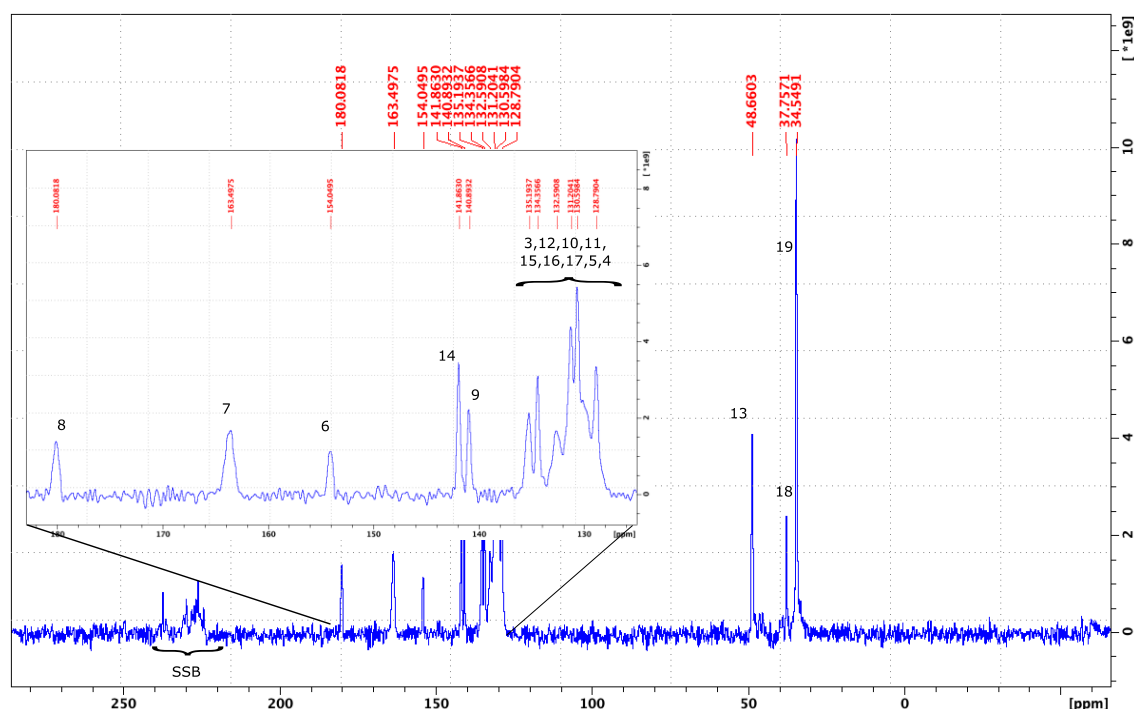

**Figure S14.** Cross polarization  $^{13}\text{C}\{^1\text{H}\}$  solid state NMR spectra of **LQOF-G6**. Contact time 3 ms during polarization ramp 50 to 100%, spun at 12 kHz, SSB - indicate spin side band,  $^{13}\text{C}$  acquired at 125.695 MHz,  $^1\text{H}$  at 499.832 MHz was decoupled using 70 kHz pulse power with spinal 64 sequence.

LQOF-G6 new batch characterization data:  $^1\text{H}$  NMR (500.13 MHz,  $\text{CDCl}_3$ )  $\delta$  = 12.09 (s, 1H), 8.29 (dd,  $J$  = 7.26/1.11 Hz, 2H), 7.50 (tt,  $J$  = 7.32/1.11 Hz, 1H), 7.43 (dt,  $J$  = 7.26/7.32 Hz, 2H), 7.42 (d,  $J$  = 8.26 Hz, 2H), 7.37 (2H), 7.317 (1H), 7.21 (d,  $J$  = 8.26 Hz, 2H), 5.33 (t,  $J$  = 5.89 Hz, 1H), 4.83 (d,  $J$  = 5.89 Hz, 2H), 1.31 (9H);  $^{13}\text{C}$  NMR (100.61 MHz,  $\text{CDCl}_3$ )  $\delta$  = 177.456 (C=O), 158.676 (N=C), 150.139 (C), 138.571 (C), 138.184 (C), 133.508 (C), 131.239 (*p*-CH), 128.965 (2CH), 128.669 (2CH), 127.875 (2CH), 127.498 (2CH + *p*-CH), 127.455 (2CH), 127.043 (2CH), 125.386 (2CH), 45.784 (N-CH<sub>2</sub>), 34.566 (C), 31.181 (CH<sub>3</sub>). HRESIMS  $m/z$  386.2227 [ $\text{M}+\text{H}$ ]<sup>+</sup> (calcd. for  $\text{C}_{25}\text{H}_{28}\text{N}_3\text{O}^+$ , 386.2227,  $\Delta$  = - 0.0 ppm); HPLC purity 95.8%; mp. 124.4–125.7 °C.

**LQOF-G32 Characterization**

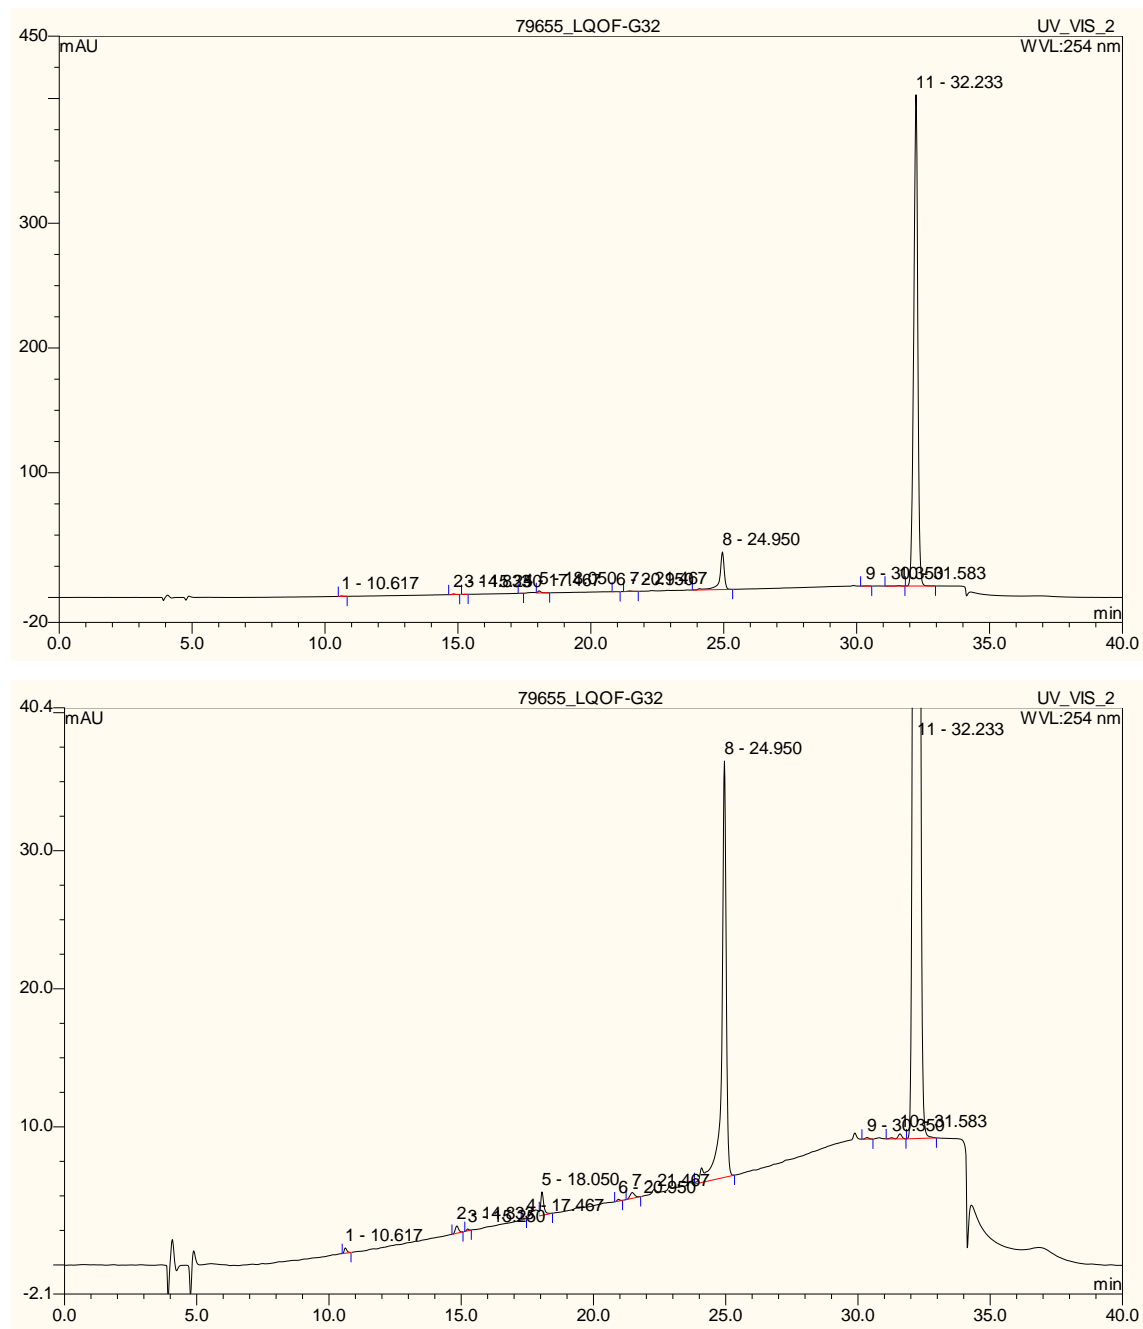

**Figura S15. LC-(HPLC) analysis report – LQOF-G32**



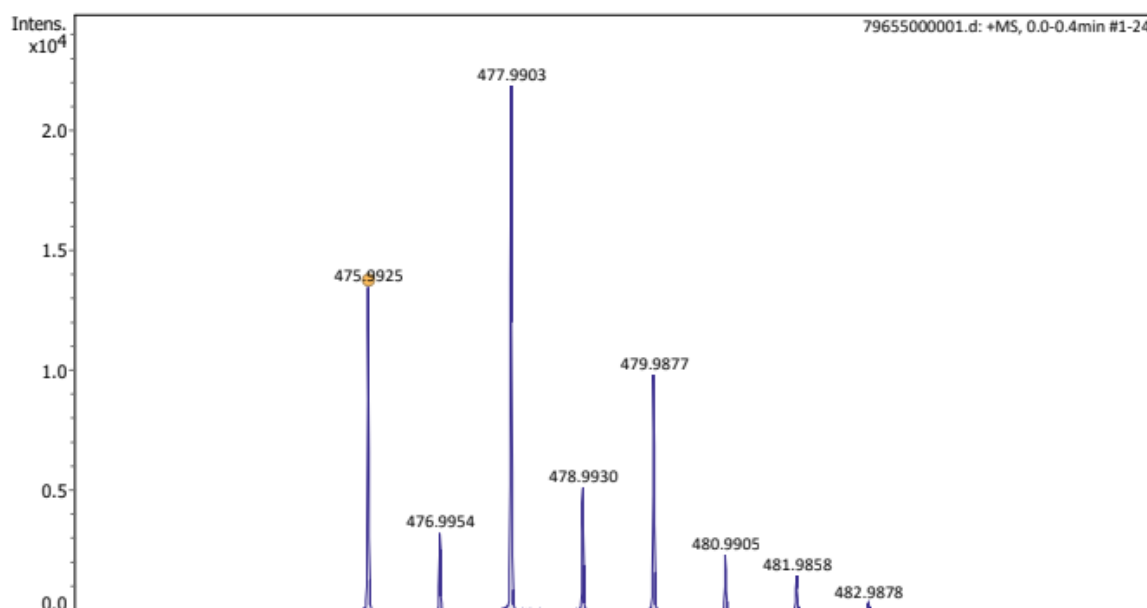

**Figure S16.** ESI-(+)MS analysis report of LQOF-G32

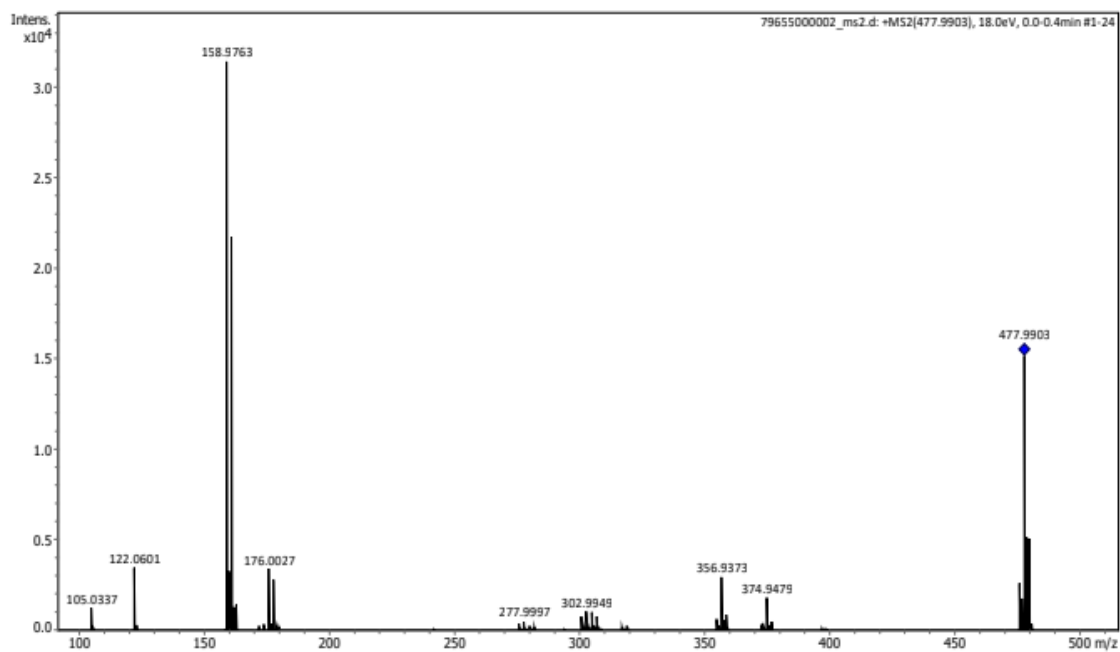

**Figure S17.** ESI-(+) MS/MS analysis report of LQOF-G32.

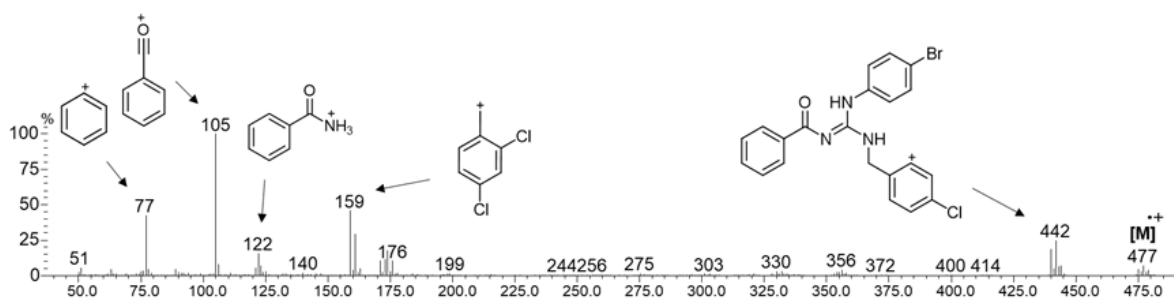

**Figure S18.** EI-MS analysis report of LQOF-G32.

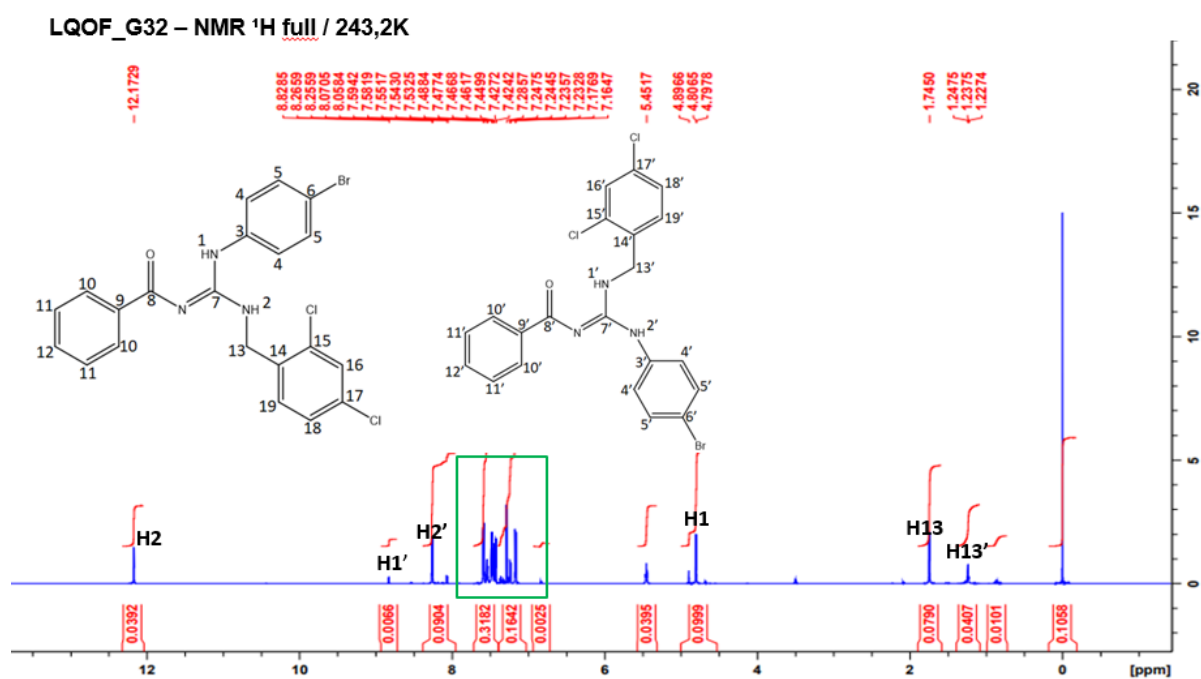

**Figure S19.**  $^1\text{H}$  NMR full spectrum of LQOF-G32 at 243K in  $\text{CDCl}_3$ .

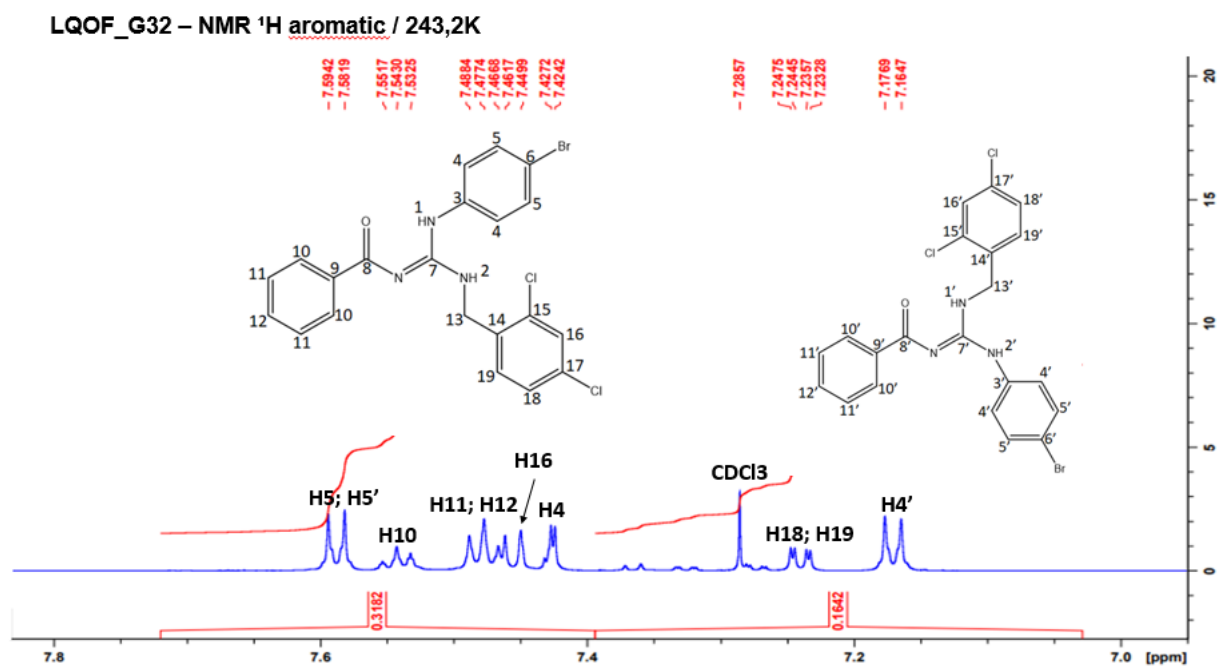

**Figure S20.**  $^1\text{H}$  NMR aromatic spectrum of **LQOF-G32** at 243K in  $\text{CDCl}_3$ .

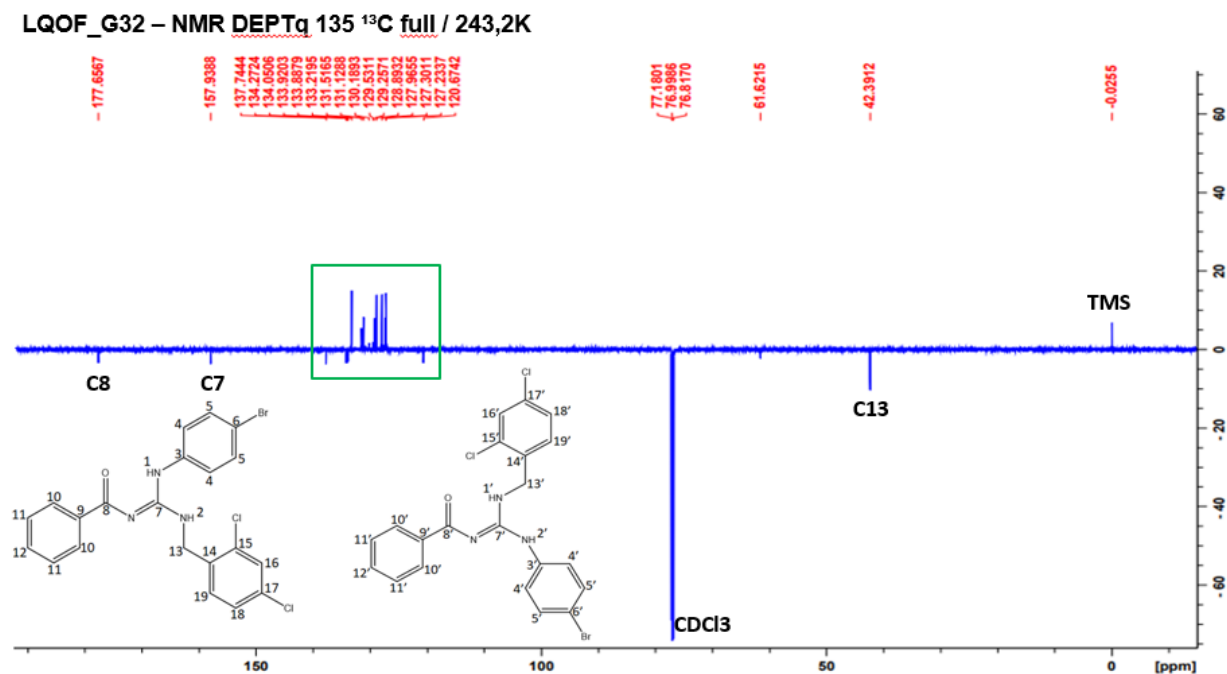

**Figure S21.**  $^{13}\text{C}$  NMR DEPT135q full spectrum of **LQOF-G32** at 243K in  $\text{CDCl}_3$ .

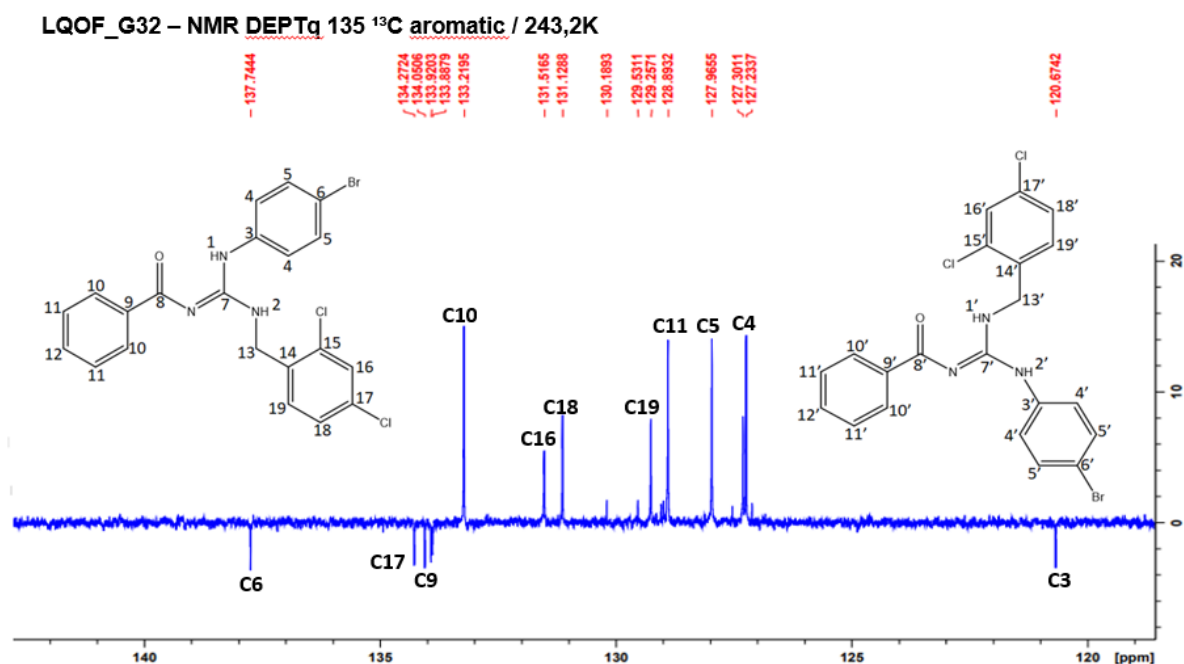

**Figure S22.** <sup>13</sup>C NMR DEPT135q aromatic spectrum of **LQOF-G32** at 243K in CDCl<sub>3</sub>

LQOF-G32 new batch characterization data: <sup>1</sup>H NMR (600.25 MHz, CDCl<sub>3</sub>) δ = 12.17 (br, NH), 8.26 (d, 2H), 7.58 (d, 2H), 7.54 (t, 1H), 7.48-7.42 (m, 3H), 7.24 (d, 1H), 7.23 (d, 1H), 7.17 (d, 1H), 4.80 (d, 3H), 1.74 (br, NH). <sup>13</sup>C NMR (150.95 MHz, CDCl<sub>3</sub>) δ = 177.65 (C=O), 157.93 (C), 137.74 (C), 134.27 (C), 134.05 (C), 133.92 (C), 133.88 (C), 133.21 (2CH), 131.51 (CH), 131.12 (CH), 129.25 (CH), 128.89 (2CH), 127.96 (2CH), 127.30 (CH), 127.23 (2CH), 120.67 (C), 42.39 (CH<sub>2</sub>). HPLC purity 91.45%; mp: 128.1-128.8°C; ESI (+)-MS: *m/z* encontrada 475,9925, *m/z* calculada para [C<sub>21</sub>H<sub>16</sub>BrCl<sub>2</sub>N<sub>3</sub>O + H]<sup>+</sup>: 475,9927, Fragmento iônico observado em ESI(+)-MS/MS: [M + H – C<sub>6</sub>H<sub>5</sub>CONH<sub>2</sub>]<sup>+</sup> de *m/z* 356,9373 e [M + H – C<sub>13</sub>H<sub>10</sub>BrCl<sub>2</sub>N<sub>2</sub>]<sup>+</sup> de *m/z* 122,0601.

**DRX****Table S3. LQOF-G6** Crystal data, data collection parameters, and structure refinement.

|                                                |                                                                 |
|------------------------------------------------|-----------------------------------------------------------------|
| Identification code                            | <b>LQOF-G6_Pca21</b>                                            |
| Empirical formula                              | <b>C<sub>25</sub>H<sub>27</sub>N<sub>3</sub>O</b>               |
| Formula weight                                 | 385.49                                                          |
| Temperature/K                                  | 120.0                                                           |
| Crystal system                                 | orthorhombic                                                    |
| Space group                                    | Pca2 <sub>1</sub>                                               |
| a/Å                                            | 12.0522(5)                                                      |
| b/Å                                            | 9.4398(3)                                                       |
| c/Å                                            | 37.7926(14)                                                     |
| $\alpha/^\circ$                                | 90                                                              |
| $\beta/^\circ$                                 | 90                                                              |
| $\gamma/^\circ$                                | 90                                                              |
| Volume/Å <sup>3</sup>                          | 4299.7(3)                                                       |
| Z                                              | 8                                                               |
| $\rho_{\text{calc}}/\text{cm}^3$               | 1.191                                                           |
| $\mu/\text{mm}^{-1}$                           | 0.074                                                           |
| F(000)                                         | 1648.0                                                          |
| Crystal size/mm <sup>3</sup>                   | 0.2 × 0.06 × 0.02                                               |
| Radiation                                      | MoK $\alpha$ ( $\lambda$ = 0.71073)                             |
| 2 $\Theta$ range for data collection/ $^\circ$ | 4.314 to 60.128                                                 |
| Index ranges                                   | -16 ≤ h ≤ 16, -13 ≤ k ≤ 13, -53 ≤ l ≤ 53                        |
| Reflections collected                          | 140718                                                          |
| Independent reflections                        | 12591 [ $R_{\text{int}}$ = 0.0427, $R_{\text{sigma}}$ = 0.0213] |
| Data/restraints/parameters                     | 12591/1/529                                                     |
| Goodness-of-fit on F <sup>2</sup>              | 1.023                                                           |
| Final R indexes [ $I \geq 2\sigma(I)$ ]        | $R_1$ = 0.0397, $wR_2$ = 0.0966                                 |
| Final R indexes [all data]                     | $R_1$ = 0.0476, $wR_2$ = 0.1015                                 |
| Largest diff. peak/hole / e Å <sup>-3</sup>    | 0.22/-0.19                                                      |
| Flack parameter                                | -0.1(3)                                                         |

## Datablock: lqof\_g6\_pca21

Bond precision: C-C = 0.0032 Å Wavelength=0.71073  
 Cell: a=12.0522(5) b=9.4398(3) c=37.7926(14)  
 alpha=90 beta=90 gamma=90  
 Temperature: 120 K

|                        | Calculated   | Reported     |
|------------------------|--------------|--------------|
| Volume                 | 4299.7(3)    | 4299.7(3)    |
| Space group            | P c a 21     | P c a 21     |
| Hall group             | P 2c -2ac    | P 2c -2ac    |
| Moiety formula         | C25 H27 N3 O | C25 H27 N3 O |
| Sum formula            | C25 H27 N3 O | C25 H27 N3 O |
| Mr                     | 385.50       | 385.49       |
| Dx, g cm <sup>-3</sup> | 1.191        | 1.191        |
| Z                      | 8            | 8            |
| Mu (mm <sup>-1</sup> ) | 0.074        | 0.074        |
| F000                   | 1648.0       | 1648.0       |
| F000'                  | 1648.59      |              |
| h,k,lmax               | 16,13,53     | 16,13,53     |
| Nref                   | 12628[ 6406] | 12591        |
| Tmin,Tmax              | 0.995,0.999  | 0.770,0.802  |
| Tmin'                  | 0.985        |              |

Correction method= # Reported T Limits: Tmin=0.770  
 Tmax=0.802 AbsCorr = MULTI-SCAN  
 Data completeness= 1.97/1.00 Theta(max)= 30.064  
 R(reflections)= 0.0397( 11132) wR2(reflections)=  
 0.1015( 12591)  
 S = 1.023 Npar= 529

The following ALERTS were generated. Each ALERT has the format

**test-name ALERT alert-type alert-level.**

Click on the hyperlinks for more details of the test.

### Alert level C

[PLAT911](#) [ALERT 3](#) C Missing FCF Refl Between Thmin & STh/L= 0.600 3 Report

### Alert level G

|                                                   |                                                  |              |
|---------------------------------------------------|--------------------------------------------------|--------------|
| <a href="#">PLAT007</a> <a href="#">ALERT 5</a> G | Number of Unrefined Donor-H Atoms .....          | 4 Report     |
| <a href="#">PLAT032</a> <a href="#">ALERT 4</a> G | Std. Uncertainty on Flack Parameter Value High . | 0.300 Report |
| <a href="#">PLAT720</a> <a href="#">ALERT 4</a> G | Number of Unusual/Non-Standard Labels .....      | 8 Note       |
| <a href="#">PLAT910</a> <a href="#">ALERT 3</a> G | Missing # of FCF Reflection(s) Below Theta(Min). | 2 Note       |
| <a href="#">PLAT912</a> <a href="#">ALERT 4</a> G | Missing # of FCF Reflections Above STh/L= 0.600  | 9 Note       |
| <a href="#">PLAT913</a> <a href="#">ALERT 3</a> G | Missing # of Very Strong Reflections in FCF .... | 1 Note       |
| <a href="#">PLAT955</a> <a href="#">ALERT 1</a> G | Reported (CIF) and Actual (FCF) Lmax Differ by . | 1 Units      |
| <a href="#">PLAT978</a> <a href="#">ALERT 2</a> G | Number C-C Bonds with Positive Residual Density. | 17 Info      |

0 **ALERT level A** = Most likely a serious problem - resolve or explain  
 0 **ALERT level B** = A potentially serious problem, consider carefully  
 1 **ALERT level C** = Check. Ensure it is not caused by an omission or oversight  
 8 **ALERT level G** = General information/check it is not something unexpected

1 ALERT type 1 CIF construction/syntax error, inconsistent or missing data  
 1 ALERT type 2 Indicator that the structure model may be wrong or deficient  
 3 ALERT type 3 Indicator that the structure quality may be low  
 3 ALERT type 4 Improvement, methodology, query or suggestion  
 1 ALERT type 5 Informative message, check

It is advisable to attempt to resolve as many as possible of the alerts in all categories. Often the minor alerts point to easily fixed oversights, errors and omissions in your CIF or refinement strategy, so attention to these fine details can be worthwhile. In order to resolve some of the more serious problems

it may be necessary to carry out additional measurements or structure refinements. However, the purpose of your study may justify the reported deviations and the more serious of these should normally be commented upon in the discussion or experimental section of a paper or in the "special\_details" fields of the CIF. checkCIF was carefully designed to identify outliers and unusual parameters, but every test has its limitations and alerts that are not important in a particular case may appear. Conversely, the absence of alerts does not guarantee there are no aspects of the results needing attention. It is up to the individual to critically assess their own results and, if necessary, seek expert advice.

#### Publication of your CIF in IUCr journals

A basic structural check has been run on your CIF. These basic checks will be run on all CIFs submitted for publication in IUCr journals (*Acta Crystallographica*, *Journal of Applied Crystallography*, *Journal of Synchrotron Radiation*); however, if you intend to submit to *Acta Crystallographica Section C* or *E* or *IUCrData*, you should make sure that [full publication checks](#) are run on the final version of your CIF prior to submission.

#### Publication of your CIF in other journals

Please refer to the *Notes for Authors* of the relevant journal for any special instructions relating to CIF submission.

---

PLATON version of 20/01/2022; check.def file version of 19/01/2022

#### Datablock lqof\_g6\_pca21 - ellipsoid plot

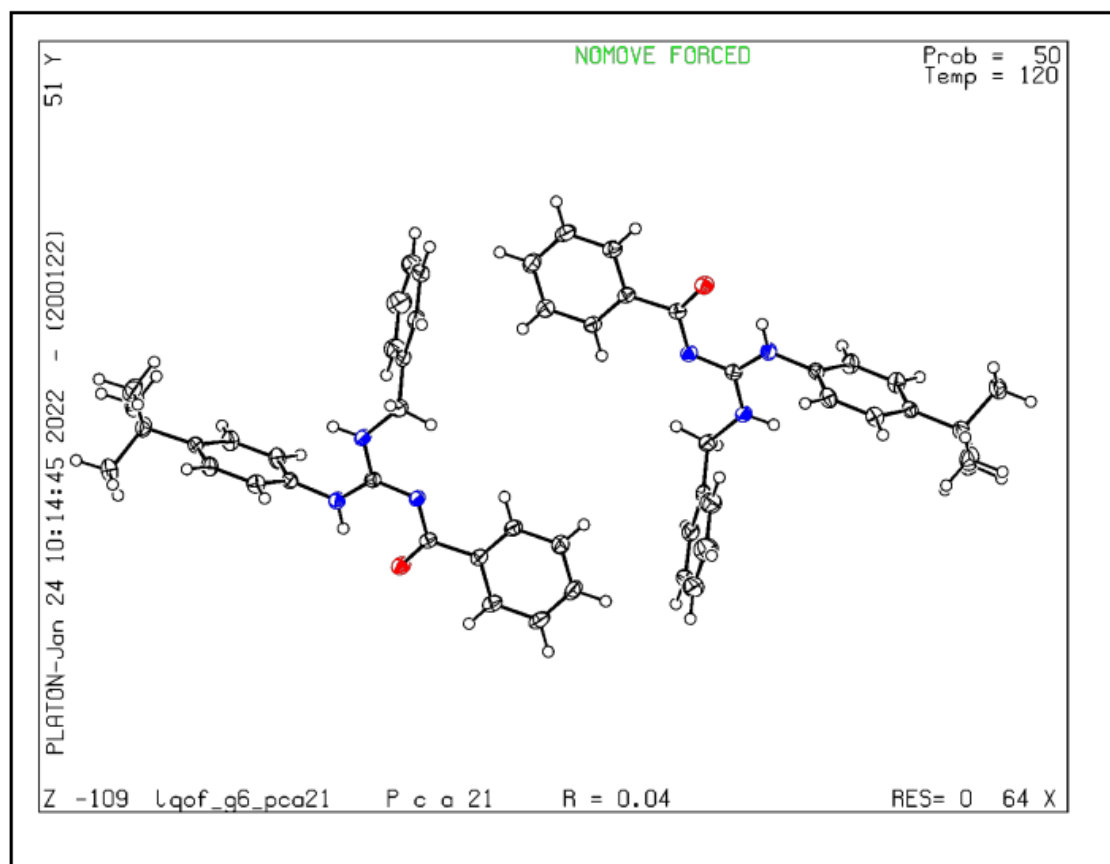

**Figure S23.** Datablock: lqof\_g6\_pca21.

**Table S4.** Sample, crystal data and data collection and structure refinement.

|                                                |                                                   |
|------------------------------------------------|---------------------------------------------------|
| Identification code                            | <b>LQOF-G6_Pca21</b>                              |
| Empirical formula                              | $C_{21}H_{18}N_4O_3$                              |
| Formula weight                                 | 374.39                                            |
| Temperature/K                                  | 100.0                                             |
| Crystal system                                 | orthorhombic                                      |
| Space group                                    | P212121                                           |
| a/Å                                            | 6.9519(6)                                         |
| b/Å                                            | 12.307(2)                                         |
| c/Å                                            | 20.307(2)                                         |
| $\alpha/^\circ$                                | 90                                                |
| $\beta/^\circ$                                 | 90                                                |
| $\gamma/^\circ$                                | 90                                                |
| Volume/Å <sup>3</sup>                          | 1804.8(3)                                         |
| Z                                              | 4                                                 |
| $\rho_{\text{calc}}/\text{cm}^3$               | 1.378                                             |
| $\mu/\text{mm}^{-1}$                           | 0.095                                             |
| F(000)                                         | 784.0                                             |
| Crystal size/mm <sup>3</sup>                   | 0.15 × 0.01 × 0.03                                |
| Radiation                                      | MoK $\alpha$ ( $\lambda = 0.71073$ )              |
| 2 $\Theta$ range for data collection/ $^\circ$ | 5.124 to 60.21                                    |
| Index ranges                                   | -9 ≤ h ≤ 9, -18 ≤ k ≤ 18, -28 ≤ l ≤ 28            |
| Reflections collected                          | 171224                                            |
| Data/restraints/parameters                     | 5292/0/257                                        |
| Goodness-of-fit on F <sup>2</sup>              | 1049                                              |
| Final R indexes [ $I \geq 2\sigma(I)$ ]        | R <sub>1</sub> = 0.0337, wR <sub>2</sub> = 0.0853 |
| Final R indexes [all data]                     | R <sub>1</sub> = 0.0317, wR <sub>2</sub> = 0.0831 |
| Largest diff. peak/hole / e Å <sup>-3</sup>    | 0.26/-0.20                                        |



No syntax errors found.  
Please wait while processing ....

[CIF dictionary](#)  
[Interpreting this report](#)

## Datablock: prka\_lqof\_g1\_lt\_p212121

Bond precision: C-C = 0.0021 Å Wavelength=0.71073  
Cell: a=6.9519(6) b=12.7844(13) c=20.307(2)  
alpha=90 beta=90 gamma=90  
Temperature: 100 K

|                                                               | Calculated    | Reported      |
|---------------------------------------------------------------|---------------|---------------|
| Volume                                                        | 1804.8(3)     | 1804.8(3)     |
| Space group                                                   | P 21 21 21    | P 21 21 21    |
| Hall group                                                    | P 2ac 2ab     | P 2ac 2ab     |
| Moiety formula                                                | C21 H18 N4 O3 | C21 H18 N4 O3 |
| Sum formula                                                   | C21 H18 N4 O3 | C21 H18 N4 O3 |
| Mr                                                            | 374.39        | 374.39        |
| Dx, g cm <sup>-3</sup>                                        | 1.378         | 1.378         |
| Z                                                             | 4             | 4             |
| Mu (mm <sup>-1</sup> )                                        | 0.095         | 0.095         |
| F000                                                          | 784.0         | 784.0         |
| F000'                                                         | 784.34        |               |
| h,k,lmax                                                      | 9,18,28       | 9,18,28       |
| Nref                                                          | 5312[ 3024]   | 5292          |
| Tmin,Tmax                                                     | 0.989,0.997   | 0.660,0.746   |
| Tmin'                                                         | 0.986         |               |
| Correction method= # Reported T Limits: Tmin=0.660 Tmax=0.746 |               |               |
| AbsCorr = MULTI-SCAN                                          |               |               |
| Data completeness= 1.75/1.00 Theta(max)= 30.105               |               |               |
| R(reflections)= 0.0317( 5085) wR2(reflections)= 0.0853( 5292) |               |               |
| S = 1.049 Npar= 257                                           |               |               |

The following ALERTS were generated. Each ALERT has the format  
[test-name\\_ALERT\\_alert-type\\_alert-level](#).  
Click on the hyperlinks for more details of the test.

The following ALERTS were generated. Each ALERT has the format  
[test-name\\_ALERT\\_alert-type\\_alert-level](#).  
Click on the hyperlinks for more details of the test.

### Alert level C

[STRVA01\\_ALERT\\_4\\_C](#) Flack parameter is too small  
From the CIF: \_refine\_ls\_abs\_structure\_Flack -0.300  
From the CIF: \_refine\_ls\_abs\_structure\_Flack\_su 0.300  
[PLAT414\\_ALERT\\_2\\_C](#) Short Intra D-H...H-X H4 ..H7 1.94 Ang.  
x,y,z = 1\_555 Check  
[PLAT480\\_ALERT\\_4\\_C](#) Long H...A H-Bond Reported H15B ..02 2.61 Ang.  
[PLAT911\\_ALERT\\_3\\_C](#) Missing FCF Refl Between Tmin & STh/L= 0.600 10 Report  
[PLAT913\\_ALERT\\_3\\_C](#) Missing # of Very Strong Reflections in FCF .... 4 Note

### Alert level G

[PLAT007\\_ALERT\\_5\\_G](#) Number of Unrefined Donor-H Atoms ..... 1 Report  
[PLAT032\\_ALERT\\_4\\_G](#) Std. Uncertainty on Flack Parameter Value High . 0.300 Report  
[PLAT898\\_ALERT\\_4\\_G](#) Second Reported H-M Symbol in CIF Ignored ..... ! Check  
[PLAT910\\_ALERT\\_3\\_G](#) Missing # of FCF Reflection(s) Below Theta(Min). 2 Note  
[PLAT912\\_ALERT\\_4\\_G](#) Missing # of FCF Reflections Above STh/L= 0.600 3 Note  
[PLAT916\\_ALERT\\_2\\_G](#) Hooft y and Flack x Parameter Values Differ by . 0.12 Check  
[PLAT933\\_ALERT\\_2\\_G](#) Number of OMIT Records in Embedded .res File ... 2 Note  
[PLAT978\\_ALERT\\_2\\_G](#) Number C-C Bonds with Positive Residual Density. 16 Info

0 ALERT level A = Most likely a serious problem - resolve or explain  
0 ALERT level B = A potentially serious problem, consider carefully  
5 ALERT level C = Check. Ensure it is not caused by an omission or oversight  
8 ALERT level G = General information/check it is not something unexpected

0 ALERT type 1 CIF construction/syntax error, inconsistent or missing data  
4 ALERT type 2 Indicator that the structure model may be wrong or deficient  
3 ALERT type 3 Indicator that the structure quality may be low  
5 ALERT type 4 Improvement, methodology, query or suggestion  
1 ALERT type 5 Informative message, check

It is advisable to attempt to resolve as many as possible of the alerts in all categories. Often the minor alerts point to easily fixed oversights, errors and omissions in your CIF or refinement strategy, so

attention to these fine details can be worthwhile. In order to resolve some of the more serious problems it may be necessary to carry out additional measurements or structure refinements. However, the purpose of your study may justify the reported deviations and the more serious of these should normally be commented upon in the discussion or experimental section of a paper or in the "special\_details" fields of the CIF. checkCIF was carefully designed to identify outliers and unusual parameters, but every test has its limitations and alerts that are not important in a particular case may appear. Conversely, the absence of alerts does not guarantee there are no aspects of the results needing attention. It is up to the individual to critically assess their own results and, if necessary, seek expert advice.

#### Publication of your CIF in IUCr journals

A basic structural check has been run on your CIF. These basic checks will be run on all CIFs submitted for publication in IUCr journals (*Acta Crystallographica*, *Journal of Applied Crystallography*, *Journal of Synchrotron Radiation*); however, if you intend to submit to *Acta Crystallographica Section C* or *E* or *IUCrData*, you should make sure that [full publication checks](#) are run on the final version of your CIF prior to submission.

#### Publication of your CIF in other journals

Please refer to the *Notes for Authors* of the relevant journal for any special instructions relating to CIF submission.

---

PLATON version of 22/12/2019; check.def file version of 13/12/2019

#### Datablock prka\_lqof\_g1\_lt\_p212121 - ellipsoid plot

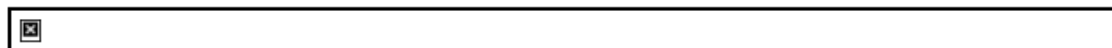


---

[Download CIF editor \(publCIF\) from the IUCr](#)  
[Download CIF editor \(enCIFer\) from the CCDC](#)  
[Test a new CIF entry](#)

**Figure S24.** Datablock: prka\_lqof\_g1\_lt\_p212121.

**Table S5.** Cell viability in cultures growing in the presence of nine different concentrations of LQOF-G6.

| LQOF-G6 (μM) | HEK-293 | KB-3  | CACO-2 | A-549 |
|--------------|---------|-------|--------|-------|
| 1.6          | 99.7    | 113.6 | 105.9  | 116.3 |
| 3.1          | 101.8   | 96.9  | 107.9  | 108.2 |
| 6.2          | 114.5   | 103.3 | 105.5  | 95.1  |
| 12.5         | 94.05   | 93.1  | 95.1   | 96.2  |
| 25           | 89.9    | 100.5 | 102.8  | 107.6 |
| 50           | 105.4   | 91.9  | 104.5  | 99.2  |
| 100          | 103.8   | 95.6  | 103.0  | 124.3 |
| 200          | 106.6   | 101.0 | 110.1  | 114.8 |
| 400          | 87.2    | 88.6  | 83.5   | 89.6  |

\*Measurement for each concentration was performed in triplicate and the average value is reported.

**Table S6.** Effect of **LQOF-G6** on the rate of activity of the right atrium.

| LQOF-G6 ( $\mu\text{M}$ ) | $f \pm \text{SEM}^*$<br>(beats/min) | $\Delta f \pm \text{SEM}^*$<br>(%) | Number of<br>Experiments (n) | Probability (P) |
|---------------------------|-------------------------------------|------------------------------------|------------------------------|-----------------|
| Control                   | $195.00 \pm 21.21$                  | $0.00 \pm 0.00$                    | 4                            | --              |
| 3                         | $188.75 \pm 21.22$                  | $-3.52 \pm 1.58$                   | 4                            | n.s.            |
| 10                        | $182.50 \pm 23.24$                  | $-7.12 \pm 2.70$                   | 4                            | n.s.            |
| 30                        | $178.75 \pm 21.93$                  | $-8.70 \pm 3.85$                   | 4                            | n.s.            |
| 100                       | $172.50 \pm 22.78$                  | $-12.31 \pm 4.24$                  | 4                            | <0.05           |

**Table S7.** Effect of **LQOF-G6** on the contraction force of the papillary muscle.

| LQOF-G6 ( $\mu\text{M}$ ) | $f_c \pm \text{SEM}^*$<br>(mN) | $\Delta f_c \pm \text{SEM}^*$<br>(%) | Number of<br>Experiments<br>(n) | Probability (P) |
|---------------------------|--------------------------------|--------------------------------------|---------------------------------|-----------------|
| Control                   | $1.32 \pm 0.21$                | $0.00 \pm 0.00$                      | 4                               | --              |
| 3                         | $1.20 \pm 0.21$                | $-9.27 \pm 5.91$                     | 4                               | n.s.            |
| 10                        | $1.21 \pm 0.14$                | $-5.41 \pm 6.95$                     | 4                               | n.s.            |
| 30                        | $1.20 \pm 0.14$                | $2.18 \pm 6.64$                      | 4                               | n.s.            |
| 100                       | $1.35 \pm 0.14$                | $5.43 \pm 6.54$                      | 4                               | n.s.            |

**Table S8.** Effect of **LQOF-G6** on the contraction force of the aorta.

| LQOF-G6 ( $\mu\text{M}$ ) | $f_c \pm \text{SEM}^*$<br>(mN) | $\Delta f_c \pm \text{SEM}^*$<br>(%) | Number of<br>Experiments (n) | Probability (P) |
|---------------------------|--------------------------------|--------------------------------------|------------------------------|-----------------|
| Control                   | $10.34 \pm 0.91$               | $0.00 \pm 0.00$                      | 5                            | --              |
| 3                         | $10.23 \pm 0.91$               | $-1.11 \pm 2.27$                     | 5                            | n.s.            |
| 10                        | $10.09 \pm 0.93$               | $-2.39 \pm 3.37$                     | 5                            | n.s.            |
| 30                        | $9.79 \pm 0.86$                | $-5.17 \pm 3.91$                     | 5                            | n.s.            |
| 100                       | $9.37 \pm 0.84$                | $-9.06 \pm 4.90$                     | 5                            | n.s.            |

**Table S9.** Effect of **LQOF-G6** on the contraction force of the arteria pulmonalis.

| LQOF-G6 ( $\mu\text{M}$ ) | $f_c \pm \text{SEM}^*$<br>(mN) | $\Delta f_c \pm \text{SEM}^*$<br>(%) | Number of<br>Experiments (n) | Probability (P) |
|---------------------------|--------------------------------|--------------------------------------|------------------------------|-----------------|
| Control                   | $9.45 \pm 0.77$                | $0.00 \pm 0.00$                      | 5                            | --              |
| 3                         | $8.42 \pm 0.83$                | $-11.13 \pm 3.42$                    | 5                            | <0.05           |
| 10                        | $7.91 \pm 0.91$                | $-16.90 \pm 4.28$                    | 5                            | <0.05           |
| 30                        | $7.04 \pm 0.96$                | $-26.45 \pm 5.30$                    | 5                            | <0.05           |
| 100                       | $5.61 \pm 1.08$                | $-41.75 \pm 7.93$                    | 5                            | <0.01           |

**Table S10.** Effect of **LQOF-G6** on the contraction force of the terminal ileum.

| LQOF-G6 ( $\mu$ M) | $f_c \pm \text{SEM}^*$<br>(mN) | $\Delta f_c \pm \text{SEM}^*$<br>(%) | Number of<br>Experiments (n) | Probability (P) |
|--------------------|--------------------------------|--------------------------------------|------------------------------|-----------------|
| Control            | $8.71 \pm 1.35$                | $0.00 \pm 0.00$                      | 5                            | --              |
| 3                  | $7.12 \pm 1.41$                | $-20.02 \pm 4.03$                    | 5                            | < 0.05          |
| 10                 | $4.92 \pm 1.42$                | $-45.57 \pm 8.84$                    | 5                            | <0.01           |
| 30                 | $3.54 \pm 1.19$                | $-60.07 \pm 9.04$                    | 5                            | <0.01           |
| 100                | $2.93 \pm 1.00$                | $-67.99 \pm 6.67$                    | 5                            | <0.01           |

## Docking Investigation

### LQOF-G1 Molecule

The simulation performed upon the subunit A yielded the ligand-protein interactions described in Table S10, where the lower energy conformation is showed in the Figure S14(a) 3D representation and Figure S14(b) 2D representation.

**Table S11.** Conformations resulted from the docking procedure, ligand-target affinity with its deviation. RMSD = Root mean square deviation; l.b = lower bound; u.b = upper bound.

| Mode | Affinity (kcal/mol) | Distance from the "best" mode |           |
|------|---------------------|-------------------------------|-----------|
|      |                     | RMSD l.b.                     | RMSD u.b. |
| 1    | -7.9                | 0.000                         | 0.000     |
| 2    | -7.7                | 1.536                         | 2.162     |
| 3    | -7.6                | 5.907                         | 11.58     |
| 4    | -7.5                | 6.007                         | 11.54     |
| 5    | -7.2                | 4.897                         | 10.50     |
| 6    | -7.2                | 7.397                         | 10.43     |
| 7    | -7.1                | 6.065                         | 9.727     |
| 8    | -7.1                | 6.666                         | 12.12     |
| 9    | -7.0                | 5.528                         | 10.71     |

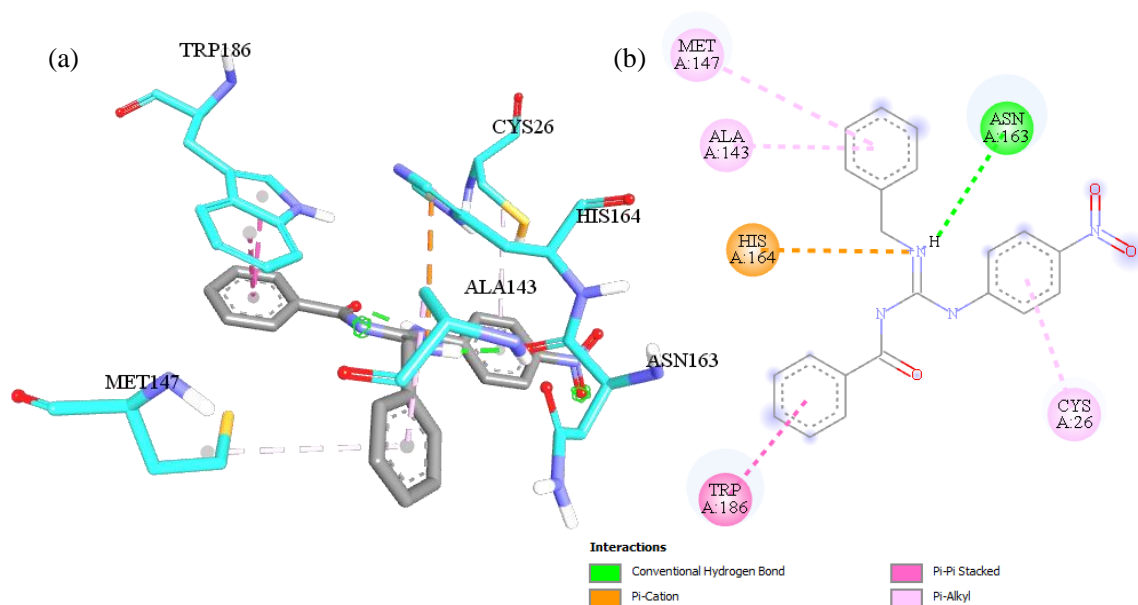

**Figure S25.** Interactions between the amino acid residues with the conformation of higher affinity in (a) 3D representation; (b) 2D representation. Cyan = carbon, red = oxygen, purple = nitrogen, yellow = sulfur, white = hydrogen. For the LQOF-G1 molecule.

The residues MET147, ALA143, and CYS26 possess the same type of interaction ( $\pi$ -alkyl) starting from  $\pi$ -orbitals with distances of 5.1593 Å, 4.6389 Å, and 4.8929 Å, respectively. The presence of the nitro electron-withdrawing group directly affects the interaction with the  $\pi$ -orbitals due to the weakening of ring and ligand synergy. This effect was elucidated from the quantum chemical DFT calculations arising out of the isosurface of the active orbitals. Figure S15 shows the representations of the molecular orbitals, where we can observe that the localization of the electron density is upon the nitro group and ring in the LUMO and LUMO+1 orbital. This translates into higher energy of the interaction with CYS26 residue, decreasing the affinity.

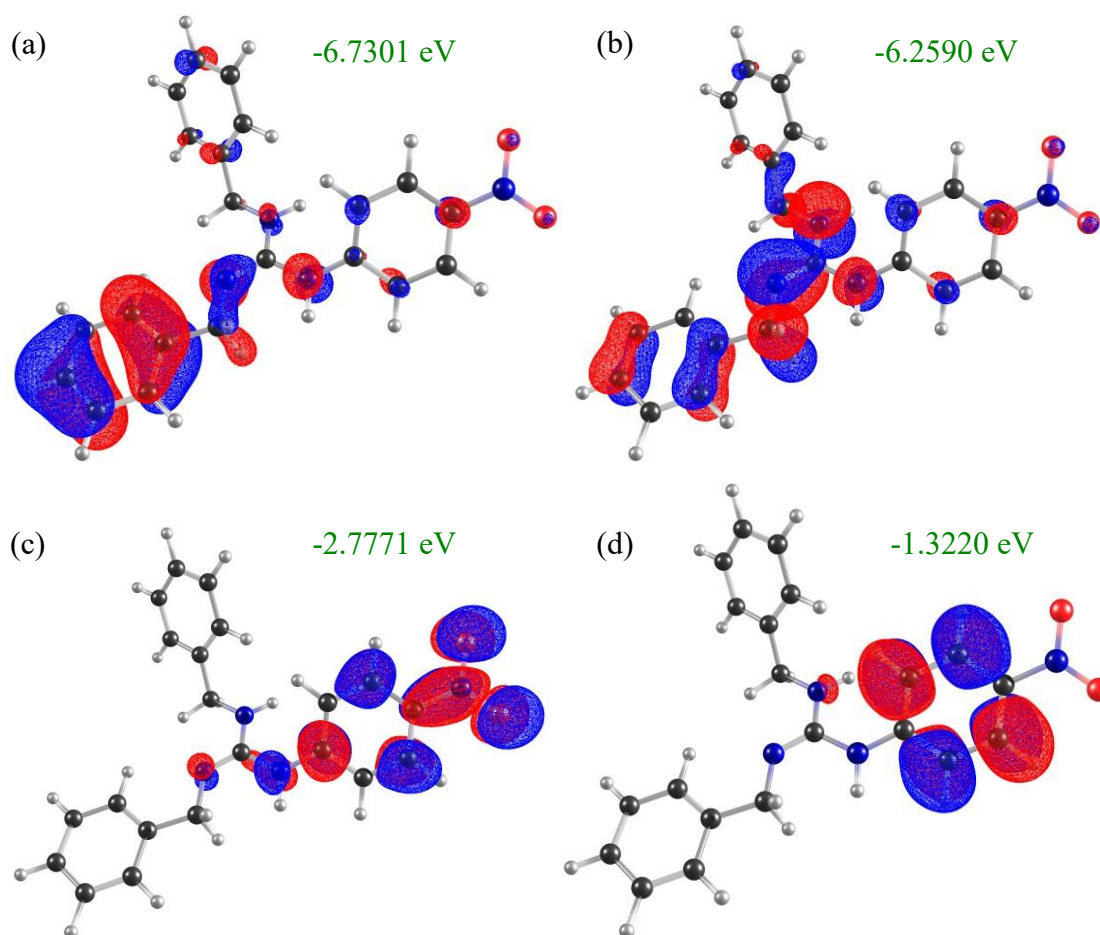

**Figure S26.** Representation of the molecular orbitals (a) HOMO-1, (b) HOMO, (c) LUMO, (d) LUMO+1 for the LQOF-G1.

### LQOF-G2 Molecule

From the docking simulation performed with the same procedure of the LQOF-G1 molecule, nine conformations were yielded with distinct interaction affinity, described in Table S11, where the lower energy conformation is showed in the Figure S16(a) 3D representation and Figure S16(b) 2D representation.

**Table S12.** Conformations resulted from the docking procedure, ligand-target affinity with its deviation. RMSD = Root mean square deviation; l.b = lower bound; u.b = upper bound.

| Mode | Affinity (Kcal/mol) | Distance from the "best" mod |           |
|------|---------------------|------------------------------|-----------|
|      |                     | RMSD l.b.                    | RMSD u.b. |
| 1    | -8.3                | 0.000                        | 0.000     |
| 2    | -8.1                | 1.405                        | 1.884     |
| 3    | -7.6                | 7.588                        | 11.43     |
| 4    | -7.5                | 6.386                        | 11.23     |

|   |      |       |       |
|---|------|-------|-------|
| 5 | -7.2 | 6.780 | 11.44 |
| 6 | -6.9 | 6.380 | 11.15 |
| 7 | -6.7 | 7.585 | 11.35 |
| 8 | -6.7 | 10.75 | 14.19 |
| 9 | -6.6 | 3.098 | 5.756 |

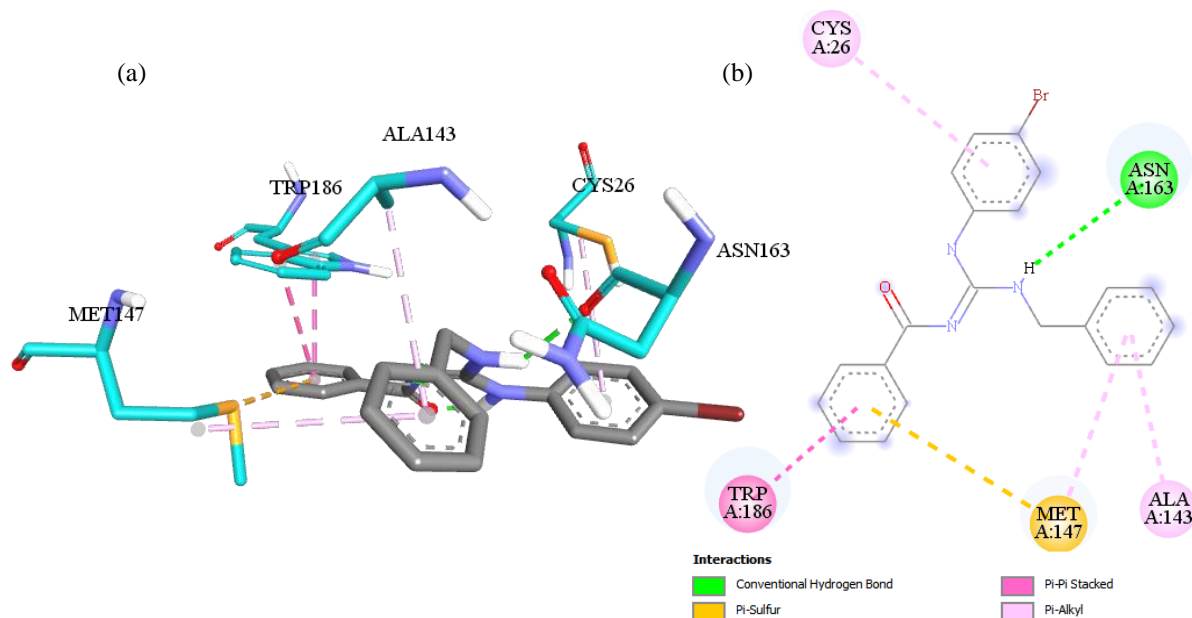

**Figure S27.** Interactions between the amino acid residues with the conformation of higher affinity in (a) 3D representation; (b) 2D representation. Cyan = carbon, red = oxygen, purple = nitrogen, yellow = sulfur, white = hydrogen, wine = bromine. For the LQOF-G2 molecule.

From the docking results, the ALA143 and CYS26 possess the same type of interaction with the ring, i.e,  $\pi$ -alkyl starting from the  $\pi$ -orbitals with distances of 4.6406 Å and 5.1131 Å, for each residue, respectively. In comparison with the LQOF-G1 molecule, there was an increase in the distance with CYS26 residue, assigned to the presence of Br atom for being an electron-withdrawing ligand from the inductive effect and electron-donating from resonant effect. Additionally, we can notice the competing a  $\pi$ -sulfur interaction between the ME147 and the amidic ring with the  $\pi$ - $\pi$  stacked interaction with the benzylamine. The isosurfaces of the active molecular orbitals for this molecule were also elucidated from the quantum mechanical calculations on the DFT level. From Figure S17, in contrast to the LQOF-G1, the HOMO possesses the electron



density upon the p-bromine ring alongside LUMO and LUMO+1. This observation highlights the electron-donating character of bromine atom, decreasing the energy of the  $\pi$ -orbitals that will interact with CYS26 residue, increasing the affinity.

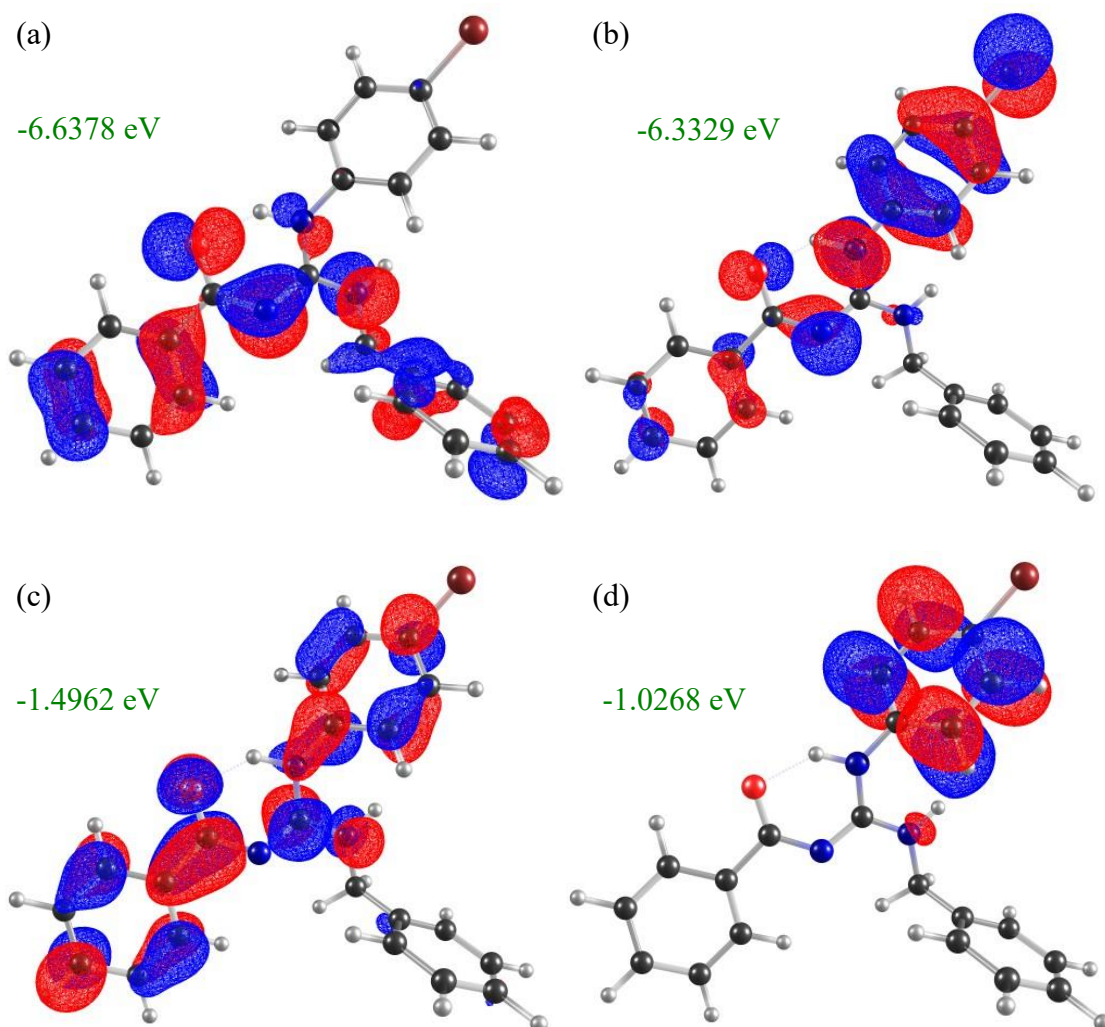

**Figure S28.** Representation of the molecular orbitals (a) HOMO-1, (b) HOMO, (c) LUMO, (d) LUMO+1. For the LQOF-G2 molecule.

### LQOF-G6

From the molecular docking performed with the same procedure of the previous molecules, nine conformations with different ligand-target affinity were yielded, which are described in the Table S12, where the lower energy conformation is showed in Figure S18(a) 3D representation and Figure S18(b) 2D representation.



**Table S13.** Conformations resulted from the docking procedure, ligand-target affinity with its deviation. RMSD = Root mean square deviation; l.b = lower bound; u.b = upper bound.

| Mode | Affinity (Kcal/mol) | Distance from the “best” mode |           |
|------|---------------------|-------------------------------|-----------|
|      |                     | RMSD l.b.                     | RMSD u.b. |
| 1    | -8.8                | 0.000                         | 0.000     |
| 2    | -8.6                | 0.929                         | 2.045     |
| 3    | -8.5                | 1.357                         | 7.789     |
| 4    | -7.9                | 1.758                         | 4.748     |
| 5    | -7.6                | 1.579                         | 4.678     |
| 6    | -7.2                | 3.101                         | 6.831     |
| 7    | -7.1                | 1.728                         | 4.239     |
| 8    | -7.0                | 1.496                         | 7.725     |
| 9    | -6.8                | 2.562                         | 3.453     |

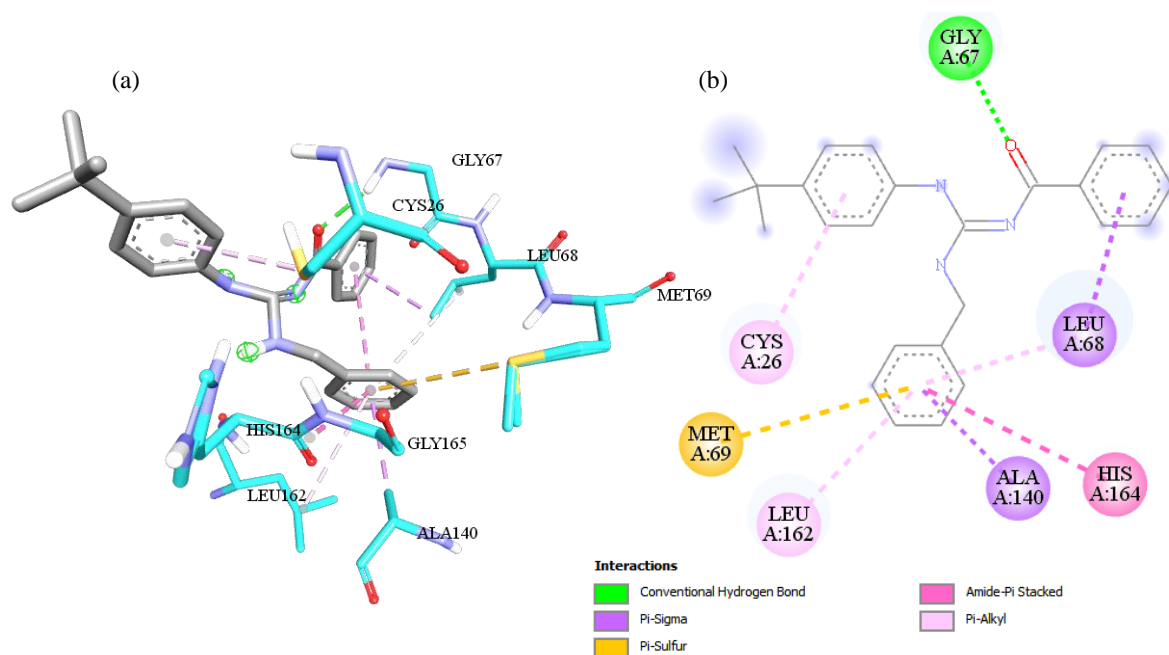

**Figure S29.** Interactions between the aminoacid residues with the conformation of higher affinity in (a) 3D representation; (b) 2D representation. Cyan = carbon, red = oxygen, purple = nitrogen, yellow = sulfur, white = hydrogen. For the LQOF-G6 molecule

In the LQOF-G6 molecule, we can notice a novel interaction between the upper-right side aromatic ring with LEU68 from a  $\pi$ -sigma mechanism and LEU162 with the lower-centered aromatic ring through a  $\pi$ -alkyl process. Additionally, the CYS26, LEU68, and LEU162 residues exhibit interactions of the same type, starting from the  $\pi$ -

orbitals with distances of 5.3806 Å, 5.3776 Å, and 5.0867 Å, respectively. The increase in the distance between CYS26 residue and the ring can be assigned to the electron-donating character of the tert-butyl group, which is accordance with the observations for the LQOF-G1 and LQOF-G2 molecules. The positions of the electron densities were obtained from a quantum mechanical calculation on the DFT level (Figure S19). The results indicate that although the tert-butyl is not directly contributing to the formation of the active molecular orbitals, its presence induces a modification of the electron density. Here, the isosurfaces are localized upon HOMO-1 and HOMO molecular orbitals instead of LUMO-type orbitals. Due to the lower energy of the HOMO orbitals, there is an increase in the affinity of the  $\pi$ -alkyl interactions.

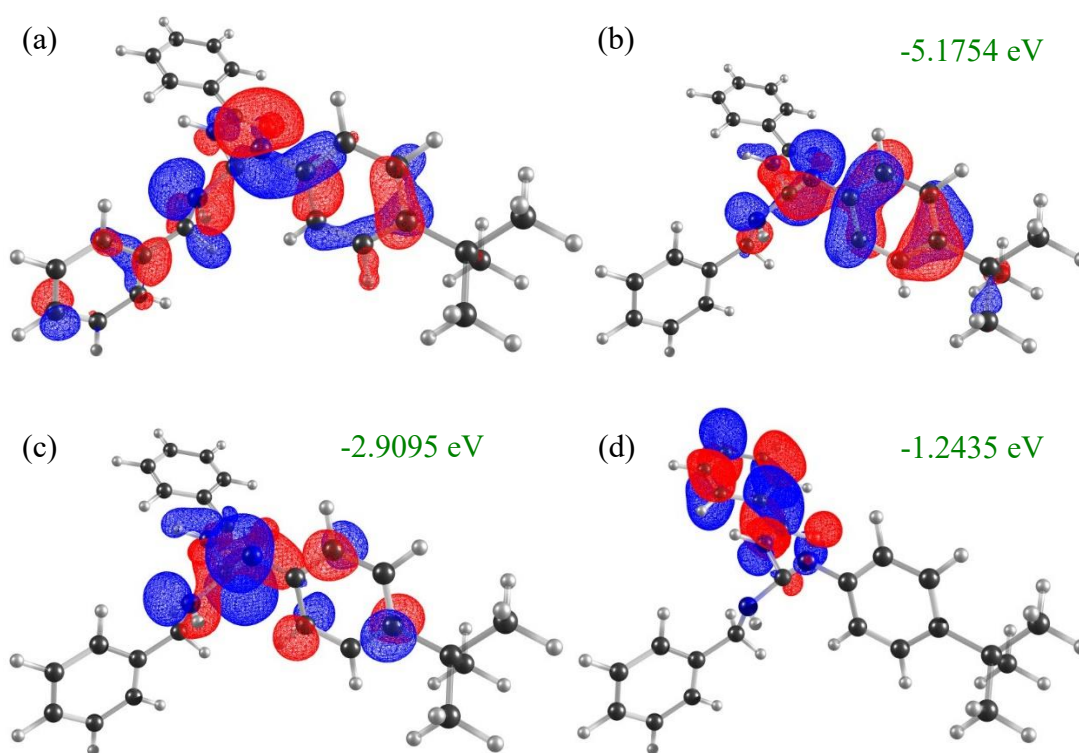

**Figure S30.** Representation of the molecular orbitals (a) HOMO-1, (b) HOMO, (c) LUMO, (d) LUMO+1 for the LQOF-G6 molecule.

#### LQOF-G32

The simulation performed upon the subunit A yielded the ligand-protein interactions described in Table S13, where the lower energy conformation is showed in the Figure S20(a) 3D representation and Figure S20(b) 2D representation.

**Table S14.** Conformations resulted from the docking procedure, ligand-target affinity with its deviation. RMSD = Root mean square deviation; l.b = lower bound; u.b = upper bound.

| Mode | Affinity (Kcal/mol) | Distance from the “best” mode |           |
|------|---------------------|-------------------------------|-----------|
|      |                     | RMSD l.b.                     | RMSD u.b. |
| 1    | -8.2                | 0.000                         | 0.000     |
| 2    | -8.1                | 10.40                         | 12.92     |
| 3    | -8.0                | 7.658                         | 10.55     |
| 4    | -7.8                | 3.558                         | 7.407     |
| 5    | -7.6                | 3.776                         | 7.294     |
| 6    | -7.6                | 7.280                         | 9.509     |
| 7    | -7.5                | 9.573                         | 12.04     |
| 8    | -7.2                | 6.580                         | 9.366     |
| 9    | -6.9                | 4.116                         | 7.005     |

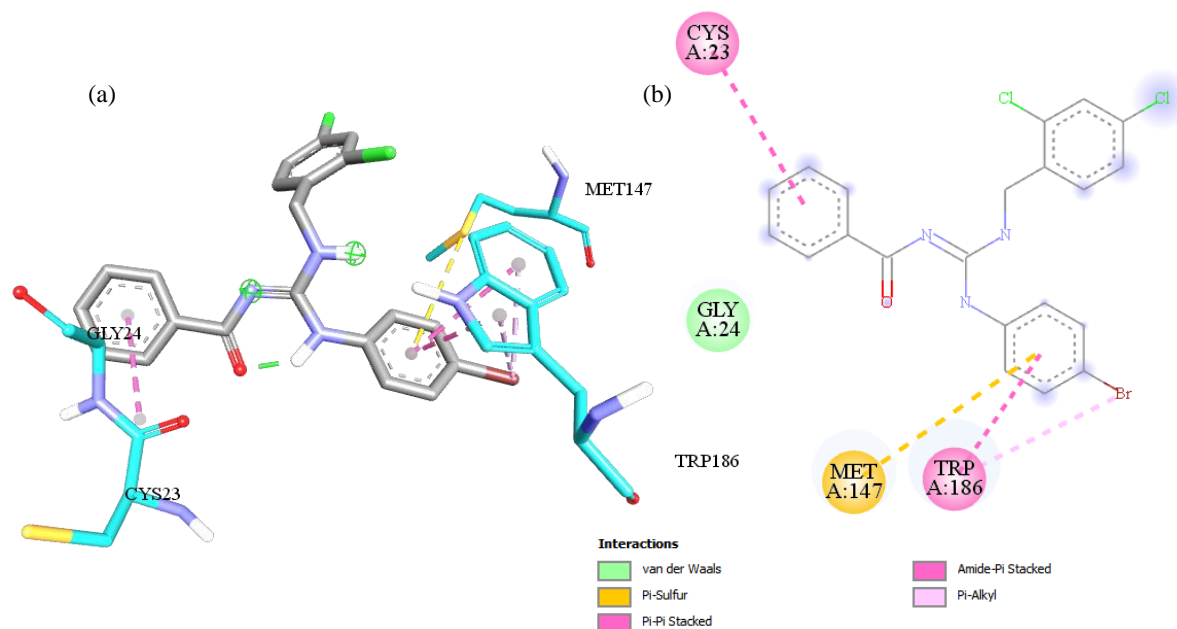

**Figure S31.** Interactions between the aminoacid residues with the conformation of higher affinity in (a) 3D representation; (b) 2D representation. Cyan = carbon, red = oxygen, purple = nitrogen, yellow = sulfur, white = hydrogen, wine = bromine, green = chlorine.

For the LQOF-G32 molecule.

From Figure S20(a) and (b), we notice the interactions of TRP186 and MET147 residues with the bromobenzyl ring through a  $\pi$ - $\pi$  stacked and  $\pi$ -sulfur mechanism, respectively. Also, there is competition from TRP186 residue with the bromine atom from a  $\pi$ -alkyl process. The distances for both residues are 3.9224 Å and 5.2821 Å respectively, while CYS23 aminoacid interacts with the amidic ring via an amide- $\pi$  stacked mechanism with 4.5842 Å. The difference between this distance from the previous for a CYS residue arises from a distinct interaction mechanism. The influence of the chlorine and bromine atoms on the molecular orbitals were also elucidated from quantum mechanical calculation on the DFT level (Figure S21). We notice that Cl atoms directly affects the formation of the LUMO and LUMO+1, due to their contribution to the formation of these MOs. Additionally, there is a redistribution of electron density occurring from the HOMO to LUMO orbitals.

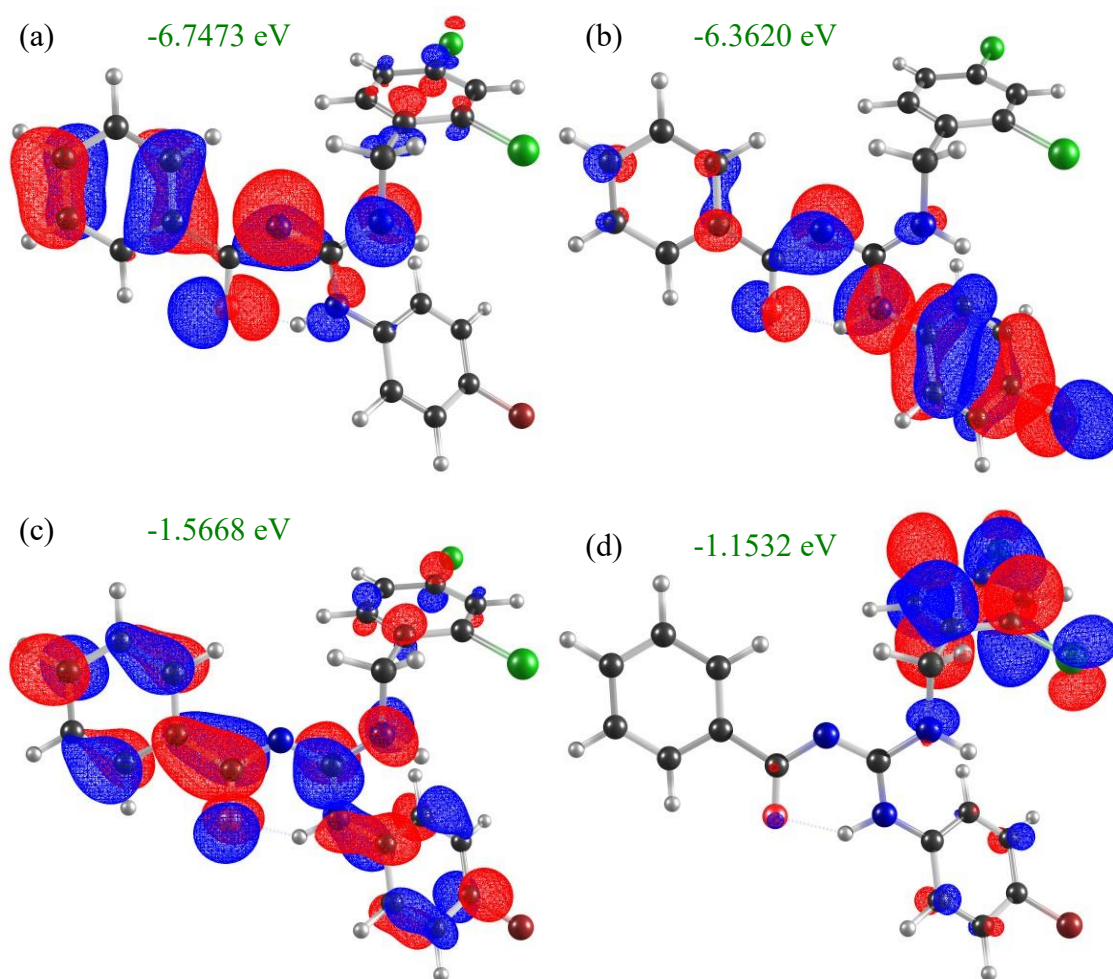

**Figure S32.** Representation of the molecular orbitals (a) HOMO-1, (b) HOMO, (c) LUMO, (d) LUMO+1 for the LQOF-G32 molecule.

## 1. STUDY REFERENCES

|                     |                                                                     |                                      |
|---------------------|---------------------------------------------------------------------|--------------------------------------|
| Study title         | <b>In Vitro Pharmacology: Proteases Assays<br/>Study of LQOF-G6</b> |                                      |
| Study number        | <b>100062592</b>                                                    | <b>FINAL REPORT<br/>May 10, 2022</b> |
| Study ID            | <b>FR095-0032854</b>                                                |                                      |
| Experimental period | May 3, 2022 - May 10, 2022                                          |                                      |

## 2. PERSONS INVOLVED IN THE STUDY

|                   |                                                                                                                                                         |                                                                            |
|-------------------|---------------------------------------------------------------------------------------------------------------------------------------------------------|----------------------------------------------------------------------------|
| Technical contact | <b>Eurofins Cerep</b><br>Le Bois l'Evêque<br>B.P. 30001<br>86 600 Celle l'Evescault<br>France<br>Tel: +33 (0)5 49 89 30 00<br>Fax: +33 (0)5 49 43 21 70 | <b>Carsten BROCK, Ph.D.</b><br>Study Director<br>CarstenBrock@eurofins.com |
| Study sponsor     | <b>University of Vienna</b><br>Dept of Pharm Chemistry<br>1090 Vienna<br>AUSTRIA                                                                        | <b>Dr. Predrag KALABA</b>                                                  |

## 3. APPROVAL

|                              |                                                                                                                                                                                              |                                                                                                                                                                                                |
|------------------------------|----------------------------------------------------------------------------------------------------------------------------------------------------------------------------------------------|------------------------------------------------------------------------------------------------------------------------------------------------------------------------------------------------|
| Head of laboratory statement | This study was conducted according to the procedures described in this report.                                                                                                               |                                                                                                                                                                                                |
|                              | <b>Eurofins Cerep</b><br>Le Bois l'Evêque<br>B.P. 30001<br>86 600 Celle l'Evescault<br>France                                                                                                | <b>Sophie SEIGNEURIN, Mrs</b><br>Operations Director<br>SophieSeigneurin@eurofins.com<br><br>Signature<br> |
| Quality assurance statement  | This study was inspected by Eurofins Cerep Quality Control Unit, the results and methods presented in this report accurately reflect the methods used and the data collected for this study. |                                                                                                                                                                                                |
|                              | <b>Eurofins Cerep</b><br>Le Bois l'Evêque<br>B.P. 30001<br>86 600 Celle l'Evescault<br>France                                                                                                | <b>Eric BOUCHET</b><br>Quality Site Group Leader<br>EricBouchet@eurofins.com<br><br>Signature<br>          |

## 4. TABLE OF CONTENTS

|                                                                     |    |
|---------------------------------------------------------------------|----|
| 1. STUDY REFERENCES .....                                           | 2  |
| 2. PERSONS INVOLVED IN THE STUDY .....                              | 2  |
| 3. APPROVAL .....                                                   | 3  |
| 4. TABLE OF CONTENTS .....                                          | 4  |
| 5. SUMMARY .....                                                    | 5  |
| 5.1. Study Design .....                                             | 5  |
| 5.2. Measurements .....                                             | 5  |
| 5.3. Results .....                                                  | 5  |
| 6. COMPOUNDS .....                                                  | 6  |
| 6.1. Test Compounds .....                                           | 6  |
| 6.2. Reference Compounds .....                                      | 6  |
| 7. RESULTS .....                                                    | 7  |
| 7.1. <i>In Vitro</i> Pharmacology: Enzyme and Uptake Assays .....   | 7  |
| 7.1.1. Test Compound Results .....                                  | 7  |
| 7.1.2. Reference Compound Results .....                             | 7  |
| 8. RESULTS INTERPRETATION GUIDE .....                               | 8  |
| 9. MATERIALS AND METHODS .....                                      | 9  |
| 9.1. Experimental Conditions .....                                  | 9  |
| 9.1.1. <i>In Vitro</i> Pharmacology: Enzyme and Uptake Assays ..... | 9  |
| 9.2. Analysis and expression of results .....                       | 10 |
| 9.2.1. <i>In Vitro</i> Pharmacology: Enzyme and Uptake Assays ..... | 10 |
| 10. BIBLIOGRAPHY .....                                              | 11 |

## 5. SUMMARY

The purpose of this study was to test LQOF-G6 in enzyme and uptake assays.

### 5.1. Study Design

LQOF-G6 was tested at 1.0E-06 M and 1.0E-05 M.

### 5.2. Measurements

Compound enzyme inhibition effect was calculated as a % inhibition of control enzyme activity.

### 5.3. Results

Results showing an inhibition or stimulation higher than 50% are considered to represent significant effects of the test compounds.

Such effects were not observed at any of the receptors studied.

## 6. COMPOUNDS

### 6.1. Test Compounds

| Client Compound ID | Compound ID | Reference Number | Batch Number | FW     | MW | Purity | Received Form | Stock solution | Flag |
|--------------------|-------------|------------------|--------------|--------|----|--------|---------------|----------------|------|
| LQOF-G6            | 100062592-2 | -                | -            | 385.22 | -  | 100.0  | Liquid        | 1.E-02 M DMSO  | -    |

FW: Formula Weight - MW: Molecular Weight

### 6.2. Reference Compounds

In each experiment and if applicable, the respective reference compound was tested concurrently with LQOF-G6, and the data were compared with historical values determined at Eurofins. The experiment was accepted in accordance with Eurofins validation Standard Operating Procedure.

## 7. RESULTS

### 7.1. In Vitro Pharmacology: Enzyme and Uptake Assays

#### 7.1.1. Test Compound Results

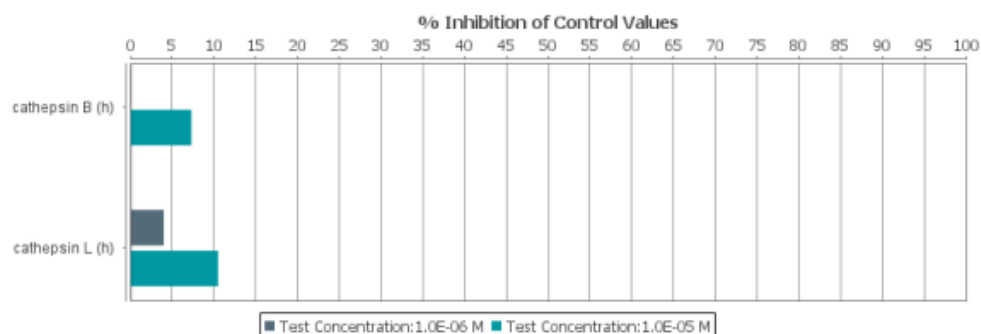

Figure 1. Histogram for LQOF-G6

| Compound I.D.   | Client Compound I.D. | Test Concentration | % Inhibition of Control Values |                 |      |
|-----------------|----------------------|--------------------|--------------------------------|-----------------|------|
|                 |                      |                    | 1 <sup>st</sup>                | 2 <sup>nd</sup> | Mean |
| cathepsin B (h) |                      |                    |                                |                 |      |
| 100062592-2     | LQOF-G6              | 1.0E-06 M          | 0.3                            | -0.2            | 0.1  |
| 100062592-2     | LQOF-G6              | 1.0E-05 M          | 8.0                            | 6.5             | 7.3  |
| cathepsin L (h) |                      |                    |                                |                 |      |
| 100062592-2     | LQOF-G6              | 1.0E-06 M          | -0.8                           | 8.7             | 4.0  |
| 100062592-2     | LQOF-G6              | 1.0E-05 M          | 12.3                           | 8.7             | 10.5 |

#### 7.1.2. Reference Compound Results

| Compound I.D.          | IC <sub>50</sub> (M) | nH  |
|------------------------|----------------------|-----|
| <b>cathepsin B (h)</b> |                      |     |
| leupeptin              | 1.7E-08 M            | 0.9 |
| <b>cathepsin L (h)</b> |                      |     |
| leupeptin              | 2.1E-09 M            | 1.1 |



## 8. RESULTS INTERPRETATION GUIDE

### *In Vitro* Pharmacology

Results showing an inhibition (or stimulation for assays run in basal conditions) higher than 50% are considered to represent significant effects of the test compounds. 50% is the most common cut-off value for further investigation (determination of IC<sub>50</sub> or EC<sub>50</sub> values from concentration-response curves) that we would recommend.

Results showing an inhibition (or stimulation) between 25% and 50% are indicative of weak to moderate effects (in most assays, they should be confirmed by further testing as they are within a range where more inter-experimental variability can occur).

Results showing an inhibition (or stimulation) lower than 25% are not considered significant and mostly attributable to variability of the signal around the control level.

Low to moderate negative values have no real meaning and are attributable to variability of the signal around the control level. High negative values (≥ 50%) that are sometimes obtained with high concentrations of test compounds are generally attributable to non-specific effects of the test compounds in the assays. On rare occasion they could suggest an allosteric effect of the test compound.

## 9. MATERIALS AND METHODS

### 9.1. Experimental Conditions

Minor variations to the experimental protocol described below may have occurred during the testing, they have no impact on the quality of the results obtained.

#### 9.1.1. *In Vitro* Pharmacology: Enzyme and Uptake Assays

| Assay                | Source         | Substrate/<br>Stimulus/Tracer | Incubation       | Measured<br>Component | Detection Method | Bibl. |
|----------------------|----------------|-------------------------------|------------------|-----------------------|------------------|-------|
| <b>Other enzymes</b> |                |                               |                  |                       |                  |       |
| cathepsin B (h)      | human placenta | Z-Arg-Arg-pNa<br>(0.3 mM)     | 180 min<br>37 °C | pNa                   | Photometry       | 10    |
| cathepsin L (h)      | human liver    | Z-Phe-Arg-AMC<br>(15 µM)      | 30 min<br>RT     | AMC                   | Fluorimetry      | 10    |

### 9.2. Analysis and expression of results

#### 9.2.1. *In Vitro* Pharmacology: Enzyme and Uptake Assays

The results are expressed as a percent of control specific activity

$$\frac{\text{measured specific activity}}{\text{control specific activity}} * 100$$

and as a percent inhibition of control specific activity

$$100 - \left( \frac{\text{measured specific activity}}{\text{control specific activity}} * 100 \right)$$

obtained in the presence of LQOF-G6.

The IC<sub>50</sub> values (concentration causing a half-maximal inhibition of control specific activity), EC<sub>50</sub> values (concentration producing a half-maximal increase in control basal activity), and Hill coefficients (nH) were determined by non-linear regression analysis of the inhibition/concentration-response curves generated with mean replicate values using Hill equation curve fitting

$$Y = D + \left[ \frac{A - D}{1 + (C/EC_{50})^{nH}} \right]$$

where Y = specific activity, A = left asymptote of the curve, D = right asymptote of the curve, C = compound concentration, C<sub>50</sub> = IC<sub>50</sub> or EC<sub>50</sub>, and nH = slope factor.

This analysis was performed using software developed at Cerep (Hill software) and validated by comparison with data generated by the commercial software SigmaPlot® 4.0 for Windows® (© 1997 by SPSS Inc.).

## **| 10. BIBLIOGRAPHY**

10. Barrett, A.J. and Kirschke, H. (1981), *Meth. Enzymol.*, 80: 535-561.

**Figure S33.** In Vitro Pharmacology: Proteases Assays Report.
